# Supplementary material for: Genetic analysis reveals the shared genetic architecture between breast cancer and atrial fibrillation
Source: Frontiers journal article supplement (doi:10.3389/fgene.2025.1450259), 2025-03-25
Supplement: Data_Sheet_1.pdf [file Data_Sheet_1.pdf]

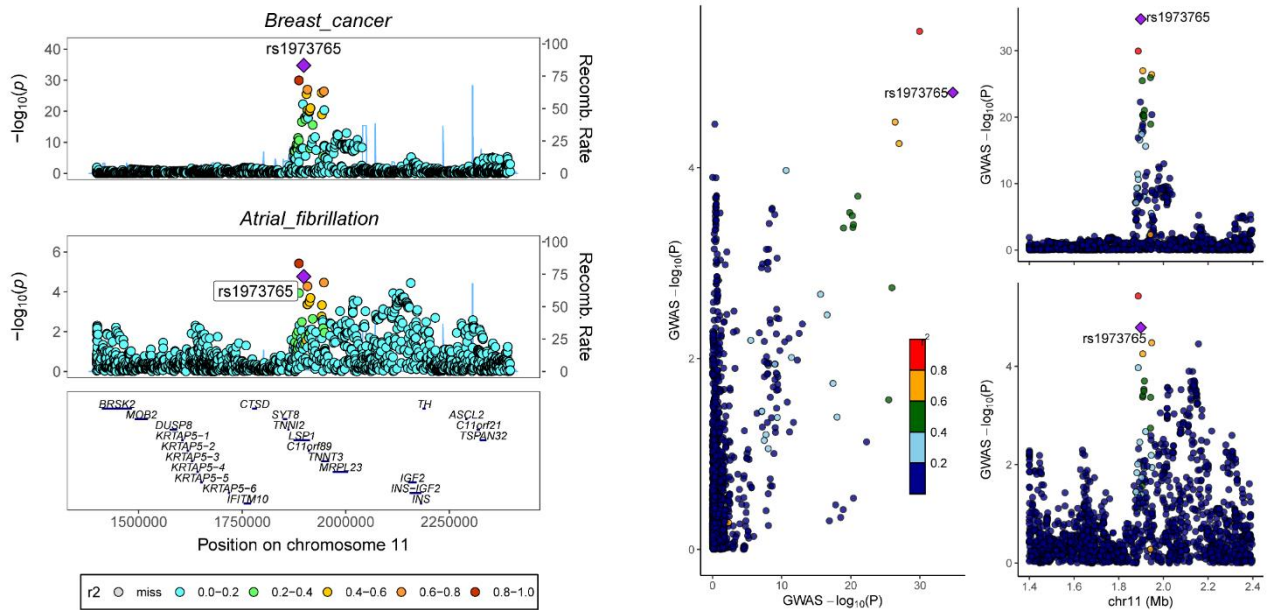

**Supplementary Figure 1:** Visualization of the colocalization results for the pleiotropic SNP rs1973765.

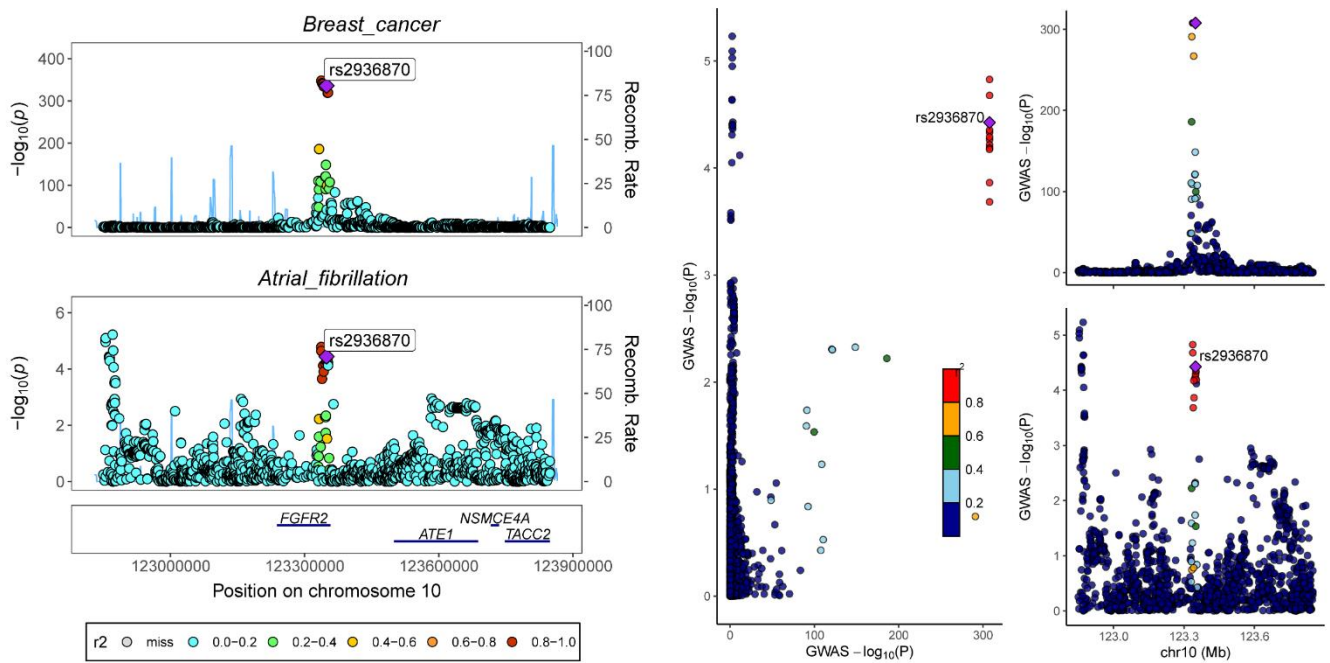

**Supplementary Figure 2:** Visualization of the colocalization results for the pleiotropic SNP rs2936870.





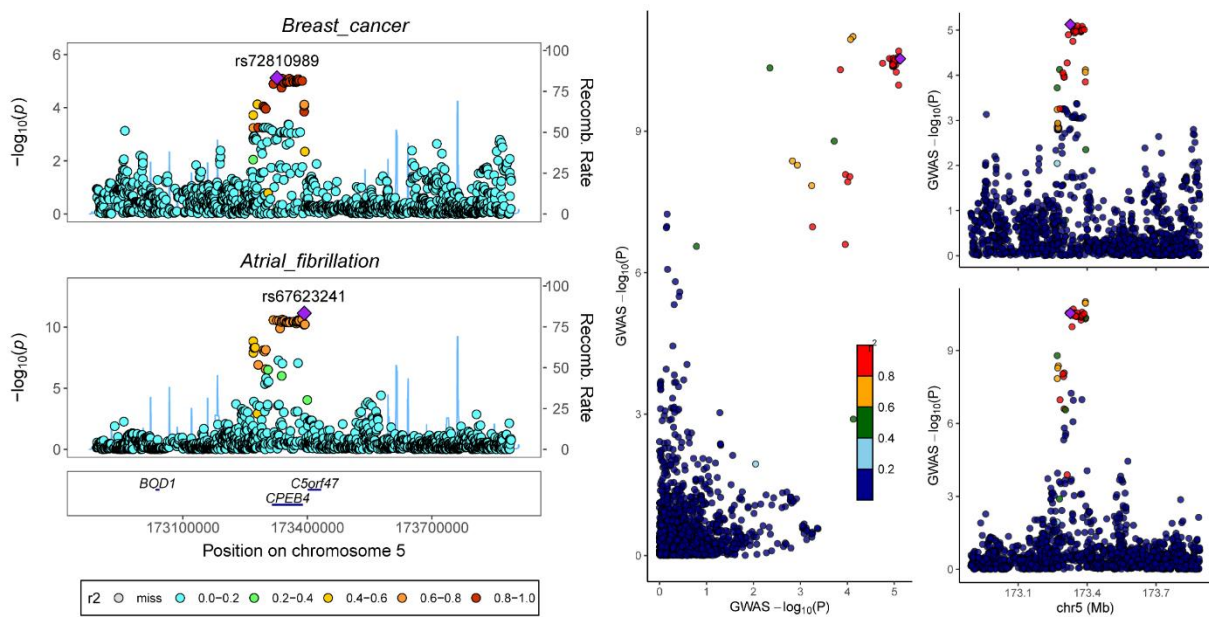

**Supplementary Figure 7:** Visualization of the colocalization results for the pleiotropic SNP rs56180201.

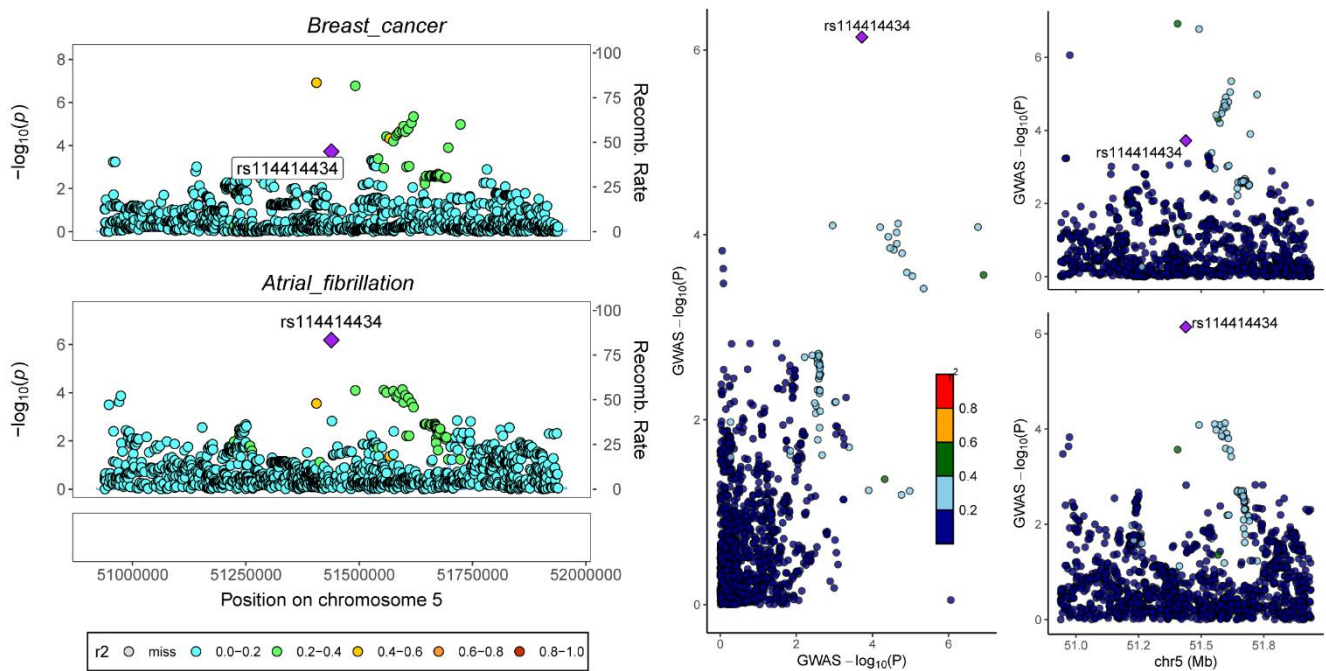

**Supplementary Figure 8:** Visualization of the colocalization results for the pleiotropic SNP rs114414434.

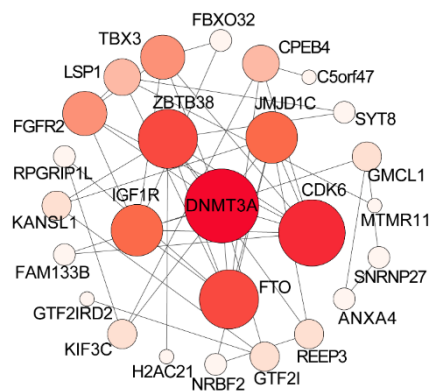

**Supplementary Figure 9:** PPI network diagram of 30 genes with potential pleiotropy, including 26 protein-coding genes. The size of the circles is proportional to the number of interactions between proteins. The lines between the circles represent the interactions between proteins.

|   | model1  | model2  | delta_elpd | se_delta_elpd | z   | p    |
|---|---------|---------|------------|---------------|-----|------|
| 1 | null    | sharing | 0.4        | 0.29          | 1.4 | 0.91 |
| 2 | null    | causal  | 1.4        | 0.50          | 2.8 | 1.00 |
| 3 | sharing | causal  | 1.0        | 0.34          | 3.0 | 1.00 |

| model   | gamma           | eta                | q              |
|---------|-----------------|--------------------|----------------|
| Sharing | NA              | 0.12 (-0.97, 1.06) | 0.04 (0, 0.22) |
| Causal  | 0 (-0.07, 0.07) | 0.13 (-0.9, 1)     | 0.05 (0, 0.26) |

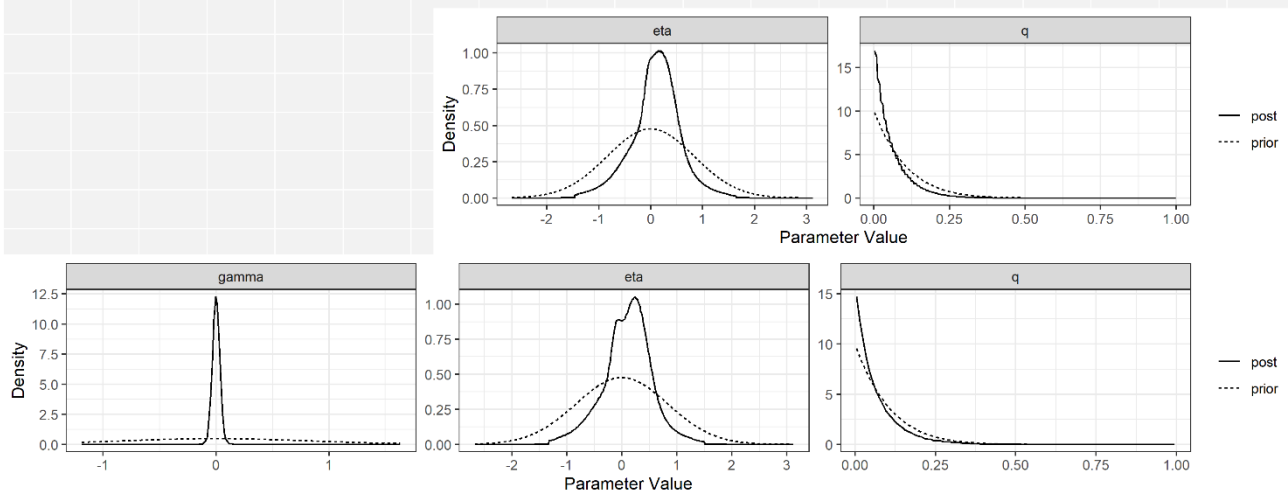

**Supplementary Figure 10:** Univariate MR analysis of atrial fibrillation on breast cancer, results of the CAUSE model.

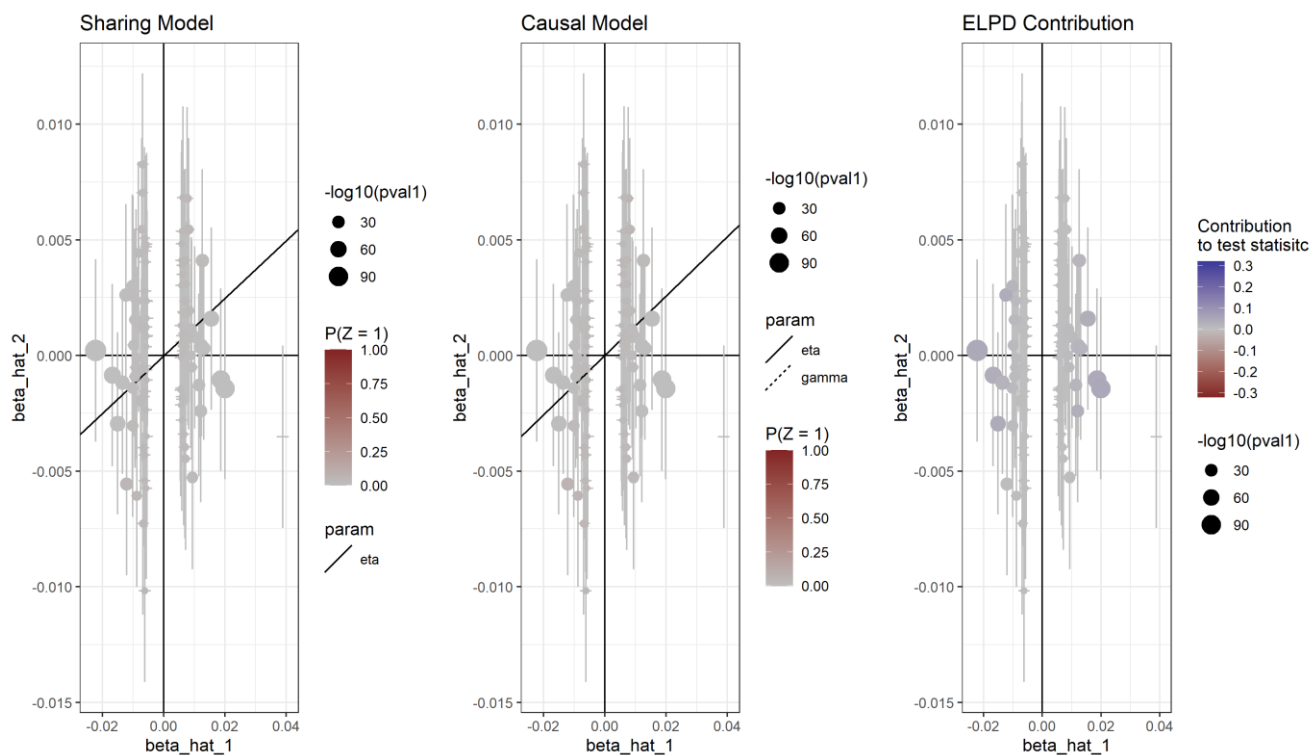

**Supplementary Figure 11:** Scatter plot of the CAUSE model results from the univariate MR analysis of atrial fibrillation on breast cancer.



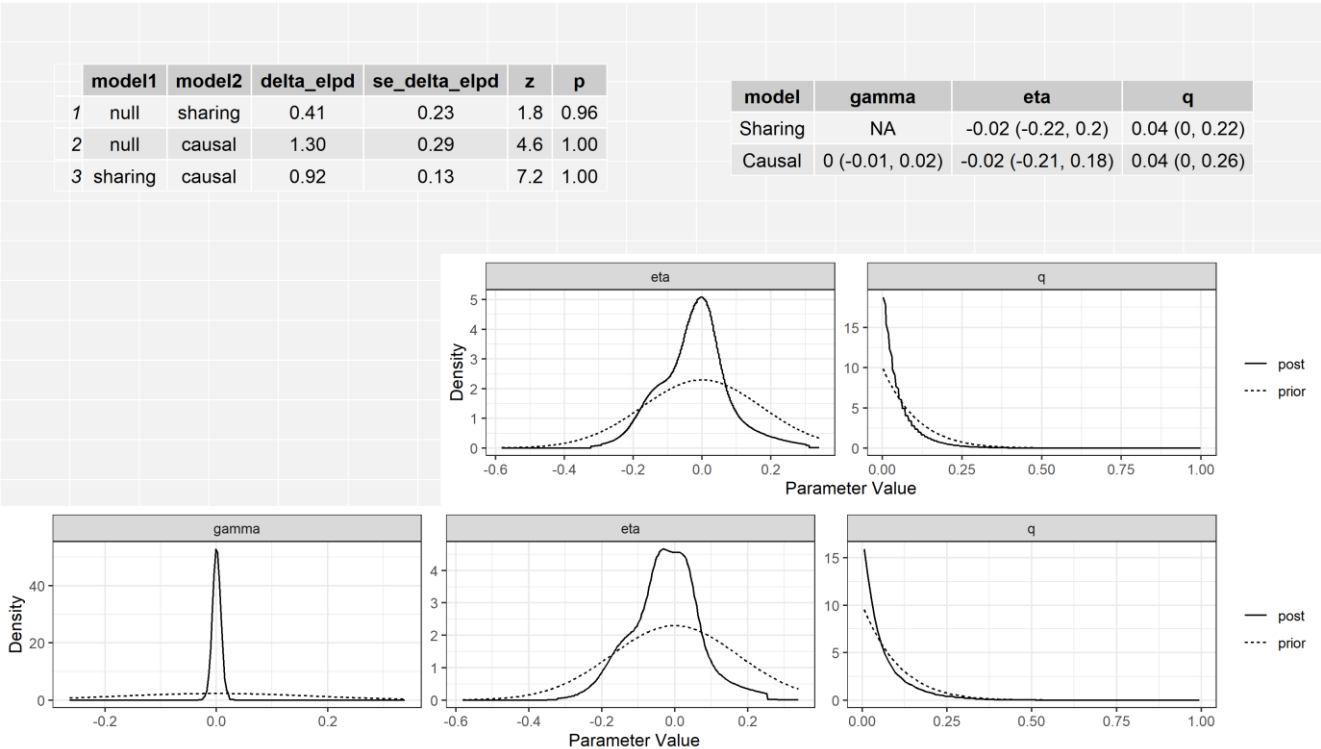

Supplementary Figure 12: Univariate MR analysis of breast cancer on atrial fibrillation, results of the CAUSE model.

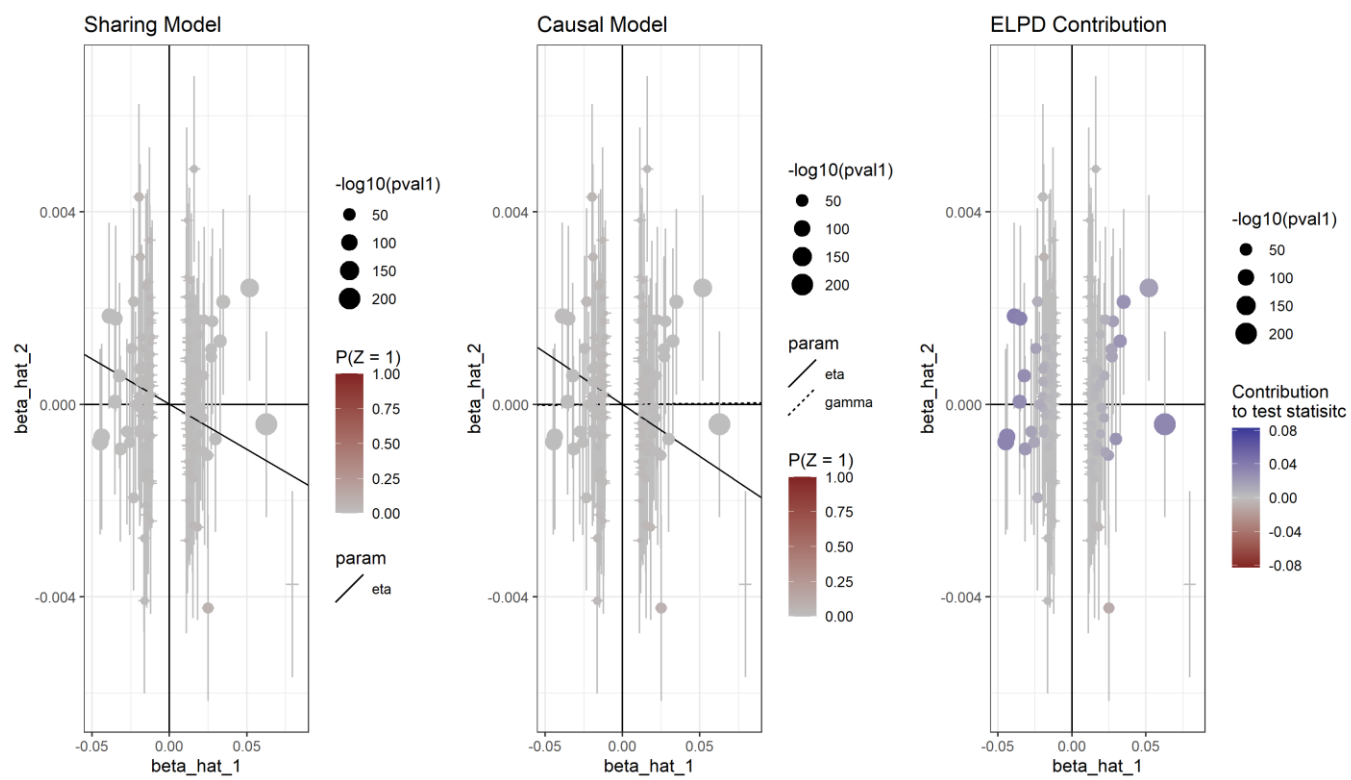

Supplementary Figure 13: Scatter plot of the CAUSE model results from the univariate MR analysis of breast cancer on atrial fibrillation.
