# Supplementary material for: Genetic analysis reveals the shared genetic architecture between breast cancer and atrial fibrillation
Source: Front Genet. 2025 Mar 25;16:1450259. doi: 10.3389/fgene.2025.1450259 (PMC11975938; doi:10.3389/fgene.2025.1450259)
Supplement: Supplementary file 1 [file Table2.XLSX]

## Sheet: Content
Content
Supplementary Table 1: This study deals with GWAS data, analytical methods and links to original articles.
Supplementary Table 2: Sections with significant genetic overlap found in the LAVA analysis.
Supplementary Table 3: Significant segments with PP_A greater than 0.5 in GWAS-PW.
Supplementary Table 4: Independent SNPs found by CPASSOC.
Supplementary Table 5: Phewas of the newly identified pleiotropic SNPs.
Supplementary Table 6: Potential causal SNPs determined for each pleiotropic SNP using FM-summary.
Supplementary Table 7: Enrichment of breast cancer in GTX v8's 54 groups as analyzed by PCGA.
Supplementary Table 8: Enrichment of atrial fibrillation in GTX v8's 54 groups as analyzed by PCGA.
Supplementary Table 9: Tissues cross-enriched in BC and AF as analyzed by PCGA.
Supplementary Table 10: Cell types enriched in breast cancer as analyzed by PCGA.
Supplementary Table 11: Cell types enriched in atrial fibrillation as analyzed by PCGA.
Supplementary Table 12: Genes significant in both AF and BC in tissue-specific TWAS analysis of GTExv8's 49 tissues using the JTI model.
Supplementary Table 13: Genes significant in both AF and BC in tissue-specific TWAS analysis of GTExv8's 49 tissues using the FOCUS model.
Supplementary Table 14: Cross-significant genes in both the JTI and FOCUS methods.
Supplementary Table 15: Phewas of pleiotropic genes identified by TWAS.
Supplementary Table 16: SNPs used as instrumental variables in univariate MR analysis for AF.
Supplementary Table 17: SNPs used as instrumental variables in univariate MR analysis for BC.
Supplementary Table 18: SNPs used as instrumental variables in GSMR for AF.
Supplementary Table 19: SNPs used as instrumental variables in GSMR for BC.
Supplementary Table 20: Calculating power for univariate MR analysis using mRnd.
Supplementary Table 21: SNPs used as instrumental variables for atrial fibrillation in multivariate MR analysis after correction for obesity, smoking, and alcohol consumption.
Supplementary Table 22: SNPs used as instrumental variables for breast cancer in multivariate MR analysis after correction for obesity, smoking, and alcohol consumption.

## Sheet: Supplementary Table 1
Supplementary Table 1: This study deals with GWAS data, analytical methods and links to original articles.
Trait or method	Population	N	Build	Web page link	Pubmed ID
DATA
Atrial_fibrillation	European	1030836	HG19/GRCh37	https://www.ebi.ac.uk/gwas/studies/GCST006414	30061737
Breast_cancer	European	247173	HG19/GRCh37	bcac.ccge.medschl.cam.ac.uk	32424353
OBESITY	European	47942	HG19/GRCh37	Risteys FinnGen R10 – E4_OBESITY --- Risteys FinnGen R10 - E4_OBESITY	NA
SmokingInitiation_WithoutUKB	European	249171	HG19/GRCh37	https://conservancy.umn.edu/handle/11299/201564	30643251
DrinksPerWeek_WithoutUKB	European	226223	HG19/GRCh37	https://conservancy.umn.edu/handle/11299/201564	30643251
CODE
LDSC				https://github.com/bulik/ldsc
HDL				https://github.com/zhenin/HDL
MiXer				https://github.com/precimed/mixer
LAVA				https://github.com/josefin-werme/LAVA
GWAS-PW				https://github.com/joepickrell/gwas-pw
CPASSOC				http://hal.case.edu/~xxz10/zhu-web/
PLINK				https://www.cog-genomics.org/plink/1.9/index
Colocalization				https://github.com/chr1swallace/coloc/
VEP				https://grch37.ensembl.org/info/docs/tools/vep/index.html
3DSNP				https://omic.tech/3dsnpv2/
Colocalization				https://github.com/chr1swallace/coloc/
FM-summary				https://github.com/hailianghuang/FM-summary
PCGA				https://pmglab.top/pcga
JTI				https://github.com/gamazonlab/MR-JTI
FOCUS				https://github.com/mancusolab/ma-focus
SNP-phewas				https://gwas.mrcieu.ac.uk/phewas/
Atlas				https://atlas.ctglab.nl
STING				https://string-db.org/
TwoSampleMR				https://mrcieu.github.io/TwoSampleMR/
GSMR				https://yanglab.westlake.edu.cn/software/gsmr/#Tutorial
CAUSE				https://github.com/jean997/cause
mRnd				https://shiny.cnsgenomics.com/mRnd/
MVMR				https://github.com/cran/MendelianRandomization
N: Sample size.

## Sheet: Supplementary Table 2
Supplementary Table 2: Sections with significant genetic overlap found in the LAVA analysis.
locus	chr	start	stop	n.snps	n.pcs	phen1	phen2	rho	rho.lower	rho.upper	r2	r2.lower	r2.upper	p	P_fdr	location_format	genes
106	1	120345067	145803848	938	245	Atrial_fibrillation	Breast_cancer	0.381224	0.2341	0.53584	0.145332	0.0548	0.28712	1.19596e-06	9.56768e-05	1p12	REG4, NBPF7, PFN1P9, NOTCH2P1, ADAM30, NOTCH2, RNU6-465P, FAM72B, HIST2H3DP1, HIST2H2BA, FCGR1B, SRGAP2C, EMBP1,SNX18P15, MIR3118-2, MIR3118-3, MIR3118-1, SNX18P16, ANKRD20A12P, ASNSP5, ANKRD20A14P, MIR3118-2,MIR3118-2, MIR3118-3, MIR3118-1, RNVU1-1, RNVU1-2, RNU1-13P, RNVU1-3, PPIAL4G, FAM72D, SRGAP2B, NBPF8, LINC00623, RNVU1-4, PPIAL4B, RNVU1-5, RNU1-59P, PFN1P2, NBPF9, PDE4DIP, RNU2-38P, RN7SK…
109	1	149716038	151146407	2409	210	Atrial_fibrillation	Breast_cancer	0.589641	0.29836	0.9244	0.347676	0.08902	0.85451	0.000192482	0.00769928	1q21.2	FCGR1A, HIST2H2BF, HIST2H3D, HIST2H4A, HIST2H3C, HIST2H2AA3, HIST2H2BD, HIST2H2BC, HIST2H2AA4, HIST2H3A, HIST2H4B, HIST2H2BE, HIST2H2AC, HIST2H2AB, BOLA1, SV2A, SF3B4, MTMR11, OTUD7B, VPS45, PLEKHO1, RN7SL480P, ANP32E, RNU2-17P, CA14, APH1A, C1orf54, C1orf51, MRPS21, PRPF3, RPRD2, TARS2, ECM1, LINC00568, ADAMTSL4, MIR4257, ADAMTSL4-AS1, RN7SL473P, RN7SL600P, MCL1, ENSA, GOLPH3L, HORMAD1, RNU6-104…
275	2	68877775	70756283	3915	320	Atrial_fibrillation	Breast_cancer	0.450986	0.19498	0.73422	0.203388	0.03802	0.53909	0.000734991	0.0136416	2p13.3	PROKR1, ARHGAP25, BMP10, GKN2, GKN1, ANTXR1, MIR3126, RNA5SP96, RNU6-1216P, GFPT1, NFU1, AAK1, RN7SL604P, SNORA36C, ANXA4, GMCL1, SNRNP27, MXD1, ASPRV1, PCBP1-AS1, RN7SL470P, PCBP1, C2orf42, TIA1, MIR1285-2, PCYOX1, SNRPG, FAM136A, BRD7P6, TGFA, TGFA-IT1
381	2	202504863	203639686	2076	248	Atrial_fibrillation	Breast_cancer	0.489052	0.16265	0.87437	0.239172	0.02662	0.76453	0.00430973	0.0344778	2q33.1	TMEM237, MPP4, RNU6-651P, ALS2, CDK15, UBE2V1P11, RNU6-440P, FZD7, PSMA2P3, DAZAP2P1, SUMO1, NOP58, SNORD70, SNORD11B, SNORD11, RN7SL753P, RN7SL40P, BMPR2,MTND4P30, FAM117B,
894	5	142532957	143605908	2386	242	Atrial_fibrillation	Breast_cancer	-0.433639	-0.70212	-0.1857	0.188043	0.03449	0.49297	0.000904313	0.0136416	5q31.3	ARHGAP26, ARHGAP26-IT1, NR3C1, RPL7P21, RNU7-156P, MIR5197, HMHB1, RN7SL87P, YIPF5, KCTD16
938	6	15069422	16566882	4023	332	Atrial_fibrillation	Breast_cancer	-0.517906	-0.89798	-0.22507	0.268227	0.05066	0.80637	0.00119364	0.0136416	6p23	RN7SL332P, JARID2, JARID2-AS1, RNU6-522P, RNU6-645P, DTNBP1, ARPC3P5, MYLIP, MIR4639, MRPL42P2, RNU6-1114P, GMPR, ATXN1,
1057	6	129850179	130550137	2120	257	Atrial_fibrillation	Breast_cancer	-0.427957	-0.74487	-0.14583	0.183147	0.02129	0.55483	0.00381485	0.0339098	6q22.33	ARHGAP18, RPL5P21, TMEM244, L3MBTL3, SAMD3
1596	10	122803507	123856184	2970	313	Atrial_fibrillation	Breast_cancer	-0.309178	-0.51781	-0.12595	0.0955909	0.01586	0.26813	0.00105845	0.0136416	10q26.12	LINC01153, RN7SKP167, FGFR2, RPS15AP5, ATE1, ATE1-AS1, NSMCE4A, TACC2
1612	11	1857846	2477449	2120	309	Atrial_fibrillation	Breast_cancer	-0.348042	-0.58215	-0.12994	0.121133	0.01688	0.3389	0.00238134	0.0238134	11p15.5	SYT8, TNNI2, LSP1, MIR4298, C11orf89, LINC01150, TNNT3, MRPL23, MRPL23-AS1, H19, IGF2, INS-IGF2, MIR483, IGF2-AS, INS, TH, MIR4686, ASCL2, C11orf21, TSPAN32, RNU6-878P, CD81-AS1, RPL26P30, CD81, TSSC4, TRPM5, KCNQ1
2181	17	7264459	8554763	3040	324	Atrial_fibrillation	Breast_cancer	0.48685	0.20359	0.80091	0.237022	0.04145	0.64146	0.00112273	0.0136416	17p13.1	TNK1, TMEM256-PLSCR3, TMEM256, NLGN2, SPEM1, C17orf74, TMEM102, FGF11, CHRNB1, ZBTB4, SLC35G6, POLR2A, TNFSF12, TNFSF12-TNFSF13, TNFSF13, SENP3, SENP3-EIF4A1, EIF4A1, SNORA67, SNORA48, SNORD10, CD68, MPDU1, SOX15, FXR2, SHBG, SAT2, ATP1B2, TP53, WRAP53, EFNB3, DNAH2, RPL29P2, KDM6B, TMEM88, LSMD1, CYB5D1, CHD3, SCARNA21, KCNAB3, TRAPPC1, CNTROB, GUCY2D, ALOX15B, ALOX12B, MIR4314, ALOXE3, HES7, PE…
2205	17	40233546	42348003	3447	301	Atrial_fibrillation	Breast_cancer	0.486421	0.15542	0.88404	0.236606	0.02417	0.78153	0.00488482	0.035526	17q21.2	DHX58, KAT2A, HSPB9, RAB5C, KCNH4, HCRT, GHDC, STAT5B, STAT5A, STAT3, PTRF, RNU7-97P, ATP6V0A1, MIR548AT, MIR5010, PTP4A2P1, NAGLU, HSD17B1P1, HSD17B1, COASY, MLX, PSMC3IP, FAM134C, TUBG1, ATP5LP7, HMGB3P27, TUBG2, PLEKHH3, CCR10, CNTNAP1, EZH1, HMGN2P15, RAMP2-AS1, RAMP2, VPS25, WNK4, COA3, CNTD1, BECN1, PSME3, AOC2, AOC3, AOC4P, LINC00671, RNU6-287P, G6PC, RNY4P2, AARSD1, PTGES3L-AARSD1, PTGES3…
rho: Genetic correlation; genes: Names of genes carried on this segment.

## Sheet: Supplementary Table 3
Supplementary Table 3: Significant segments with PP_A greater than 0.5 in GWAS-PW.
chunk	nSNP	chr	st	sp	max_abs_Z_Breast_cancer	max_abs_Z_Atrial_fibrillation	logBF_1	logBF_2	logBF_3	logBF_4	pi_1	pi_2	pi_3	pi_4	PPA_1	PPA_2	PPA_3	PPA_4	location_format	genes
32	6323	chr1	51713728	54224706	4.06588	7.36548	0.06564	19.5205	22.4499	19.5838	0.133447	0.0803102	0.0167765	0.0850483	9.78406e-10	0.165622	0.64752	0.186858	1p32.3	RNF11, TTC39A, EPS15, RNU6-877P, RNU6-1281P, CALR4P, OSBPL9, GAPDHP51, SLC25A6P3, NRD1, MIR761, TSEN15P2, RAB3B, RNA5SP48, RN7SL290P, TXNDC12, KTI12, TXNDC12-AS1, BTF3L4, ZFYVE9, RN7SL788P, PDCL3P6, DNAJC19P7, ANAPC10P1, CC2D1B, PLA2G12AP1, ORC1, PRPF38A, ZCCHC11, EEF1GP7, GPX7, FAM159A, COA7, NDUFS5P3, RN7SL62P, ZYG11B, RNU2-30P, RNU6-969P, ZYG11A, ECHDC2, SCP2, MIR1273F, MIR5095, MIR1273G, TUBB…
74	3970	chr1	148529087	151538412	8.10988	4.47788	21.1	0.794846	26.6269	21.8759	0.133447	0.0803102	0.0167765	0.0850483	0.0294251	2.69012e-11	0.92983	0.040745	1q21.2	NBPF15, PFN1P7, RNVU1-15, PPIAL4E, PFN1P6, NBPF16, RNVU1-16, PPIAL4F, NKAIN1P1, DRD5P2, RNA5SP59, NBPF23, PFN1P12, RNU1-114P, RNVU1-17, RNU1-92P, RNVU1-18, LINC00869, RNU1-143P, FCGR1C, HIST2H2BB, HIST2H3PS2, FAM72C, RNVU1-19, PPIAL4C, RNVU1-20, RNU1-68P, FAM231D, FCGR1A, HIST2H2BF, HIST2H3D, HIST2H4A, HIST2H3C, HIST2H2AA3, HIST2H2BD, HIST2H2BC, HIST2H2AA4, HIST2H3A, HIST2H4B, HIST2H2BE, HIST2H2A…
739	7727	chr2	10560	1780631	4.17616	4.79348	1.07571	1.9979	6.5171	3.07098	0.133447	0.0803102	0.0167765	0.0850483	0.0263433	0.0398689	0.764238	0.12347	2p25.3	FAM110C, SH3YL1, ACP1, FAM150B, , TMEM18, LINC01115, SNTG2, TPO, PXDN
1054	3981	chr3	139954597	141338997	7.96971	5.26866	21.7022	4.78062	31.3632	26.461	0.133447	0.0803102	0.0167765	0.0850483	0.000488241	1.3156e-11	0.96323	0.0362818	3q23	CLSTN2, CLSTN2-AS1, TRIM42, SLC25A36, SPSB4, ACPL2, ZBTB38, KRT18P35, RASA2, RASA2-IT1, YWHAQP6
1316	3501	chr5	172678547	173642755	4.65208	6.88235	2.32706	14.7168	21.0739	17.0333	0.133447	0.0803102	0.0167765	0.0850483	5.2308e-08	0.00756497	0.911198	0.081237	5q35.1	RNA5SP200, STC2, RNU6-500P, BOD1, CPEB4, C5orf47,
1482	6397	chr7	73334987	76457927	5.33749	6.30928	4.43862	8.03662	17.9468	12.45	0.133447	0.0803102	0.0167765	0.0850483	1.05936e-05	0.00023286	0.979399	0.0203569	7q11.23	ELN, LIMK1, EIF4H, MIR590, LAT2, RFC2, RNU6-1070P, CLIP2, GTF2IRD1, RNA5SP233, GTF2I, STAG3L2, PHBP15, NCF1, GTF2IRD2, PMS2P5, GATSL1, WBSCR16, GTF2IRD2B, NCF1C, GTF2IP1, PHBP6, GATSL2, PMS2P2, PMS2P10, STAG3L1, TRIM73, NSUN5P1, POM121C, PMS2P3, HIP1, RN7SL642P, CCL26, CCL24, RHBDD2, POR, MIR4651, RPL7L1P3, SNORA14A, TMEM120A, STYXL1, MDH2, RNU6-863P, SRRM3, RN7SL212P, HSPB1, YWHAG, SRCRB4D, ZP3,…
1552	2876	chr8	17388044	17836260	5.13676	7.66292	4.66113	18.2802	25.3708	22.9387	0.133447	0.0803102	0.0167765	0.0850483	5.56333e-09	0.00275083	0.689967	0.307282	8p22	SLC7A2, PDGFRL, MTUS1, MIR548V, RNA5SP256, FGL1, PCM1
1697	7064	chr9	135298917	137040737	5.32517	4.2	3.72208	-0.841882	8.61578	2.85128	0.133447	0.0803102	0.0167765	0.0850483	0.0550251	0.000345078	0.923125	0.0146802	9q34.13	C9orf171, BARHL1, DDX31, GTF3C4, AK8, RNU6-357P, C9orf9, TSC1, GFI1B, MIR548AW, RNU7-21P, EEF1A1P5, GTF3C5, CEL, CELP, RALGDS, GBGT1, OBP2B, LCN1P1, ABO, LCN1P2, SURF6, MED22, RPL7A, SNORD24, SNORD36B, SNORD36A, SNORD36C, SURF1, SURF2, SURF4, C9orf96, REXO4, ADAMTS13, CACFD1, SLC2A6, TMEM8C, ADAMTSL2, FAM163B, DBH, DBH-AS1, SARDH, VAV2, LINC00094, BRD3, WDR5, RNU6ATAC,
219	10537	chr11	1213804	3665358	12.4311	4.8	65.071	0.601891	72.9575	65.5744	0.133447	0.0803102	0.0167765	0.0850483	0.00297116	1.79385e-31	0.993896	0.00313234	11p15.5	MUC5AC, MUC5B, TOLLIP, TOLLIP-AS1, BRSK2, MOB2, DUSP8, KRTAP5-AS1, KRTAP5-1, KRTAP5-2, KRTAP5-3, KRTAP5-4, KRTAP5-5, FAM99A, FAM99B, KRTAP5-6, IFITM10, CTSD, RPL36AP39, SYT8, TNNI2, LSP1, MIR4298, C11orf89, LINC01150, TNNT3, MRPL23, MRPL23-AS1, H19, IGF2, INS-IGF2, MIR483, IGF2-AS, INS, TH, MIR4686, ASCL2, C11orf21, TSPAN32, RNU6-878P, CD81-AS1, RPL26P30, CD81, TSSC4, TRPM5, KCNQ1, KCNQ1OT1, COX6…
287	5122	chr11	116383348	117746741	4.92012	4.20115	4.8903	1.00555	9.08507	5.89265	0.133447	0.0803102	0.0167765	0.0850483	0.0898696	0.0011116	0.749496	0.156057	11q23.3	BUD13, ZNF259, APOA5, APOA4, APOC3, APOA1, APOA1-AS, SIK3, SIK3-IT1, RNY4P6, PAFAH1B2, SIDT2, TAGLN, PCSK7, RNF214, BACE1, CEP164, DSCAML1, FXYD2, FXYD6-FXYD2, FXYD6
371	1759	chr12	115037158	115502718	6.32577	5.18812	10.0837	3.15415	16.0428	13.2317	0.133447	0.0803102	0.0167765	0.0850483	0.0154978	9.12546e-06	0.754458	0.230032	12q24.21	TBX3,
579	9105	chr16	53383142	55903640	9.74476	4.64179	36.4529	1.53417	42.8559	37.9776	0.133447	0.0803102	0.0167765	0.0850483	0.0125291	5.15655e-18	0.95079	0.0366808	16q12.2	RBL2, RNU6-1153P, AKTIP, RPGRIP1L, FTO, FTO-IT1, IRX3, CRNDE, IRX5, RN7SL841P, IRX6, RPL31P56, MMP2, LPCAT2, CAPNS2, SLC6A2, CES1P2, CES1P1, CES1, CES5A
genes: Names of genes carried on this segment.

## Sheet: Supplementary Table 4
Supplementary Table 4: Independent SNPs found by CPASSOC.
SNP	CHR	BP	effect_allele	other_allele	beta_Breast_cancer	se_Breast_cancer	pval_Breast_cancer	Z_Breast_cancer	beta_Atrial_fibrillation	se_Atrial_fibrillation	pval_Atrial_fibrillation	Z_Atrial_fibrillation	p_Shet	p_Shom
rs2506885	1	10581051	T	A	-0.0628901	0.00661206	1.88094e-21	-9.51141	0.0249	0.0124	0.04524	2.00806	1.46716e-20	0.863253
rs2992756	1	18807339	C	T	-0.0516679	0.00610727	2.67227e-17	-8.46007	-0.0023	0.0066	0.7266	-0.348485	1.77982e-16	0.0258284
rs7529220	1	22282619	C	T	0.0245217	0.00909609	0.00702098	2.69585	0.0621	0.0098	1.983e-10	6.33673	6.96169e-11	1.34404e-11
rs2885697	1	41544279	T	G	0.0142605	0.00633656	0.0244162	2.25052	-0.0439	0.007	2.884e-10	-6.27143	1.52801e-10	2.20207e-08
rs79724016	1	42137311	G	T	-0.103003	0.0171968	2.10286e-09	-5.98966	0.03	0.0203	0.1391	1.47783	9.70079e-09	0.921195
rs1707302	1	46600917	G	A	0.037111	0.00636403	5.49736e-09	5.83137	0.0129	0.0071	0.06805	1.8169	2.47596e-08	0.00214508
rs11590635	1	49309764	A	G	0.0127897	0.0227313	0.573676	0.562647	0.1456	0.0248	4.123e-09	5.87097	1.96311e-08	5.39914e-09
rs146518726	1	51535039	A	G	0.0658548	0.0194836	0.000724829	3.38001	0.1605	0.0207	8.27e-15	7.75362	7.09305e-16	1.09155e-16
rs11583393	1	88429024	A	C	-0.0407615	0.00696558	4.86158e-09	-5.85184	-0.0013	0.0078	0.8649	-0.166667	2.19643e-08	0.141744
rs11102343	1	112382671	A	G	-0.00204104	0.0107748	0.849759	-0.189426	0.0663	0.0111	2.23e-09	5.97297	1.07201e-08	8.13892e-09
rs1545300	1	112464004	T	C	-0.00806134	0.00648366	0.213746	-1.24333	-0.0558	0.0073	1.481e-14	-7.64384	7.47979e-14	1.25519e-14
rs7513707	1	114445880	A	G	0.0553929	0.00796514	3.54012e-12	6.95442	0.0075	0.0087	0.3908	0.862069	1.88628e-11	0.0167652
rs4073778	1	116297758	A	C	-0.0136755	0.00616183	0.0264603	-2.21939	0.0486	0.0067	4.956e-13	7.25373	1.81231e-13	5.47428e-11
rs7529522	1	118230221	C	T	0.0457885	0.00723326	2.44721e-10	6.33028	-0.008	0.0079	0.3132	-1.01266	1.18824e-09	0.667574
rs637868	1	120257110	C	T	0.0355531	0.00610907	5.89425e-09	5.81973	0.0035	0.0067	0.5949	0.522388	2.65003e-08	0.0705999
rs11249433	1	121280613	G	A	0.0998464	0.00623911	1.21143e-57	16.0033	-0.0042	0.0069	0.5446	-0.608696	2.82681e-56	0.00285272
rs36107432	1	145604791	T	G	-0.0395378	0.00648196	1.0629e-09	-6.09967	-0.0114	0.0078	0.1451	-1.46154	4.98531e-09	0.00537312
rs79187193	1	147255831	A	G	-0.0129164	0.0137664	0.34811	-0.938261	-0.1162	0.0153	3.15e-14	-7.59477	1.80626e-13	3.09117e-14
rs11205303	1	149906413	C	T	0.0503643	0.00621024	5.06693e-16	8.10988	0.0286	0.0069	3.378e-05	4.14493	3.20358e-15	5.15602e-09
rs6689306	1	154395946	G	A	-0.012506	0.00615235	0.0420809	-2.03272	-0.046	0.0068	1.36e-11	-6.76471	1.09875e-11	2.03859e-12
rs4999127	1	154714006	A	G	-0.00569945	0.00881027	0.51769	-0.64691	0.0827	0.0098	4.279e-17	8.43878	2.12908e-16	7.56722e-16
rs1218578	1	154810030	G	A	-8.6631e-05	0.00626545	0.988968	-0.0138268	-0.0434	0.0068	1.476e-10	-6.38235	8.53361e-10	5.33142e-10
rs11264280	1	154862952	T	C	-0.003354	0.00646837	0.604093	-0.518523	0.1347	0.0071	3.067e-79	18.9718	1.23547e-78	4.63163e-75
rs1057941	1	155186742	A	G	0.0410693	0.0061317	2.11483e-11	6.69787	-0.0043	0.0069	0.5271	-0.623188	1.08473e-10	0.373304
rs72700114	1	170193825	C	G	0.0148488	0.0127503	0.244187	1.16458	0.2021	0.013	3.288e-54	15.5462	3.61758e-53	2.34967e-53
rs72700118	1	170194823	A	C	-0.0104353	0.00978229	0.286082	-1.06676	0.1227	0.0101	9.524e-34	12.1485	6.90347e-33	5.5554e-31
rs80147385	1	170231679	T	C	0.0141349	0.0148336	0.340642	0.952897	-0.0886	0.0153	7.478e-09	-5.79085	2.04727e-08	6.02992e-08
rs651386	1	170591310	T	A	-0.00299912	0.00612814	0.624558	-0.489401	-0.0923	0.0067	2.848e-43	-13.7761	5.52228e-42	1.46791e-41
rs35383942	1	201437832	T	C	0.104622	0.0132417	2.76807e-15	7.90094	0.0113	0.0148	0.4443	0.763514	1.69674e-14	0.0121612
rs10753933	1	203026214	G	T	-0.00352643	0.00611146	0.563926	-0.57702	-0.0609	0.0067	9.844e-20	-9.08955	7.27795e-19	3.04124e-19
rs59867004	1	203801249	C	T	0.0477275	0.00673297	1.3545e-12	7.08863	0.0046	0.0074	0.5364	0.621622	7.36215e-12	0.0286698
rs4951261	1	205717823	C	A	0.00743278	0.00615575	0.227258	1.20745	0.0376	0.0067	2.21e-08	5.61194	4.54302e-08	1.02489e-08
rs11117758	1	217220574	A	G	-0.0433679	0.0073844	4.28191e-09	-5.87292	0.0051	0.0082	0.5374	0.621951	1.94073e-08	0.479432
rs72755295	1	242034263	G	A	0.122011	0.0172196	1.38463e-12	7.08558	0.005	0.0202	0.8033	0.247525	7.52254e-12	0.0682186
rs539902477	2	10138607	C	T	0.0619878	0.00988468	3.58508e-10	6.2711	-0.0056	0.0238	0.8137	-0.235294	1.72537e-09	0.241142
rs11684853	2	19310918	T	G	-0.0445986	0.00602061	1.28563e-13	-7.40764	0.0046	0.0066	0.4918	0.69697	7.32569e-13	0.32851
rs2028195	2	25398953	T	G	0.0446064	0.00722382	6.62029e-10	6.17491	0.0284	0.0106	0.007496	2.67925	3.14045e-09	6.75866e-05
rs7578393	2	26165528	T	C	0.0295616	0.00775171	0.000136976	3.81357	0.0614	0.0088	2.42e-12	6.97727	1.31726e-13	2.23483e-14
rs11125871	2	61470126	T	C	-0.0119188	0.00614851	0.0525647	-1.93848	-0.0394	0.0068	6.416e-09	-5.79412	6.08226e-09	1.30317e-09
rs2540949	2	65284231	T	A	0.0162776	0.00618889	0.00853493	2.63014	-0.0659	0.0068	2.949e-22	-9.69118	6.70737e-23	9.94363e-19
rs6747542	2	70106832	C	T	-0.0164493	0.00606922	0.00672264	-2.71028	-0.0554	0.0067	1.096e-16	-8.26866	3.66608e-17	5.35414e-18
rs72926475	2	86594487	A	G	-0.00806958	0.00909608	0.374999	-0.887149	-0.0683	0.0102	2.372e-11	-6.69608	1.00561e-10	1.95729e-11
rs11903787	2	121088182	A	G	-0.0428444	0.00727112	3.80602e-09	-5.89241	0.002	0.0081	0.8055	0.246914	1.73014e-08	0.281819
rs4076654	2	121155824	T	A	-0.0476372	0.0063509	6.34008e-14	-7.50086	0.0108	0.0069	0.1198	1.56522	3.66282e-13	0.87785
rs4849879	2	121239256	G	C	0.0958418	0.00965466	3.17675e-23	9.927	-0.0032	0.0106	0.7666	-0.301887	2.64012e-22	0.0543431
rs28387148	2	127433465	T	C	-0.0171171	0.0101186	0.0907133	-1.69165	0.0741	0.0113	6.251e-11	6.55752	5.87148e-11	1.99321e-09
rs2016394	2	172972971	A	G	-0.0405809	0.00599195	1.26511e-11	-6.77257	-0.0109	0.0067	0.1032	-1.62687	6.5614e-11	0.00196912
rs2010610	2	174210908	G	C	0.0515384	0.00828957	5.05907e-10	6.21726	-0.0142	0.0091	0.1202	-1.56044	2.41518e-09	0.897827
rs56181519	2	175555714	T	C	-0.00267454	0.00725133	0.712251	-0.368834	-0.0662	0.0077	6.463e-18	-8.5974	5.54324e-17	3.1154e-17
rs2288327	2	179411665	G	A	0.0125627	0.00829945	0.130107	1.51368	0.0919	0.0089	7.257e-25	10.3258	2.76568e-24	3.10388e-25
rs56326533	2	201168758	C	T	-0.00137229	0.00616371	0.823815	-0.222641	0.0685	0.0068	6.278e-24	10.0735	6.14845e-23	1.93117e-22
rs3769821	2	202123430	T	C	-0.0561408	0.00631483	6.09377e-19	-8.89031	-0.0017	0.0071	0.813	-0.239437	4.32816e-18	0.0264961
rs35544454	2	213266003	T	A	-0.00987543	0.00785674	0.208776	-1.25694	-0.0589	0.0087	1.1e-11	-6.77011	3.52571e-11	6.70652e-12
rs2141818	2	217855058	T	C	0.1023	0.0176738	7.11443e-09	5.7882	-0.0314	0.0203	0.1224	-1.5468	3.18333e-08	0.832893
rs4442975	2	217920769	T	G	-0.132274	0.00594377	1.02721e-109	-22.2542	-0.0053	0.0067	0.4322	-0.791045	9.13333e-108	9.43211e-09
rs34005590	2	217963060	A	C	-0.199729	0.0147213	6.25496e-42	-13.5673	-0.0014	0.0159	0.9304	-0.0880503	9.38796e-41	0.00183023
rs11693806	2	218292158	G	C	-0.0731388	0.00675926	2.75167e-27	-10.8205	0.0016	0.0074	0.8318	0.216216	2.62711e-26	0.0273137
rs6436017	2	218723455	G	A	0.0394375	0.00611937	1.15829e-10	6.4447	-0.0059	0.0068	0.3882	-0.867647	5.72111e-10	0.551146
rs12479355	2	227226952	G	A	-0.0431293	0.00739989	5.5973e-09	-5.82837	-0.002	0.0082	0.8054	-0.243902	2.51982e-08	0.12376
rs6762558	3	4742251	G	A	0.054906	0.00613829	3.72546e-19	8.94482	-0.0096	0.0068	0.1548	-1.41176	2.66777e-18	0.531656
rs4642101	3	12842223	G	T	-0.00916201	0.00623085	0.141446	-1.47043	0.0706	0.0069	2.945e-24	10.2319	5.65477e-24	6.5463e-22
rs1375631	3	16778867	G	A	0.0346162	0.00597246	6.79292e-09	5.79597	-0.0054	0.0066	0.4174	-0.818182	3.04306e-08	0.617625
rs73041705	3	24463235	C	T	-0.00295303	0.00698037	0.67226	-0.423049	-0.0443	0.0073	1.546e-09	-6.06849	6.02757e-09	2.03162e-09
rs552647	3	27353716	A	C	0.104211	0.0060052	1.85998e-67	17.3534	0.0145	0.0067	0.02992	2.16418	5.64556e-66	2.21771e-09
rs12493607	3	30682939	C	G	0.0477475	0.00627368	2.72477e-14	7.61077	0.0077	0.007	0.2693	1.1	1.59997e-13	0.00560915
rs7373065	3	38710315	C	T	-0.00741104	0.0225558	0.742484	-0.328565	-0.2024	0.0251	7.584e-16	-8.06375	4.64626e-15	2.48743e-15
rs6790396	3	38771925	G	C	-0.00742496	0.00619357	0.230599	-1.19882	0.0627	0.0068	2.401e-20	9.22059	1.54319e-19	3.3805e-18
rs56387622	3	46888198	C	T	-0.0927471	0.0102004	9.67646e-20	-9.09253	0.0283	0.0109	0.00949	2.59633	7.08476e-19	0.621767
rs3821902	3	63941697	G	T	0.0620621	0.0086439	6.97789e-13	7.17987	-0.0098	0.0097	0.3106	-1.01031	3.8443e-12	0.534233
rs34080181	3	66454191	A	G	0.0155193	0.0061569	0.0117142	2.52064	-0.0446	0.0069	1.278e-10	-6.46377	2.76433e-11	1.05274e-08
rs17005647	3	69406181	T	C	-0.00760438	0.0062837	0.226211	-1.21018	0.0413	0.0069	2.698e-09	5.98551	4.52111e-09	2.86138e-08
rs6805189	3	71532113	C	T	-0.0378871	0.00599822	2.67733e-10	-6.3164	-0.002	0.0067	0.7615	-0.298507	1.29728e-09	0.0888862
rs13066793	3	87037543	G	A	-0.0730959	0.0108636	1.71395e-11	-6.72852	-0.0052	0.0121	0.6711	-0.429752	8.83129e-11	0.0547335
rs6771054	3	89489529	C	T	-0.00152756	0.006148	0.803775	-0.248465	-0.0457	0.0068	2.424e-11	-6.72059	9.3148e-11	4.38855e-11
rs9833888	3	99723580	T	G	0.0466109	0.00711781	5.81239e-11	6.54848	-0.0113	0.0079	0.1554	-1.43038	2.9157e-10	0.942561
rs10804493	3	111554426	A	G	0.00298225	0.00641004	0.641755	0.465247	0.0558	0.007	1.629e-15	7.97143	9.71539e-15	3.99703e-15
rs1278493	3	135814009	A	G	0.0146619	0.00611864	0.0165627	2.39627	-0.0389	0.0068	8.769e-09	-5.72059	3.75024e-09	4.97822e-07
rs6440006	3	141142691	A	G	0.0481424	0.00604068	1.59051e-15	7.96971	0.0333	0.0067	7.074e-07	4.97015	9.84916e-15	3.76216e-11
rs58058861	3	172285237	A	G	0.04564	0.00720605	2.39561e-10	6.33356	0.0092	0.008	0.2494	1.15	1.16376e-09	0.0113061
rs75880040	3	179159159	C	T	0.0139219	0.00826305	0.0920207	1.68483	0.0496	0.0085	5.205e-09	5.83529	6.72753e-09	1.44504e-09
rs60902112	3	194800853	T	C	-0.00832342	0.0078143	0.286807	-1.06515	0.0445	0.0079	1.719e-08	5.63291	4.26669e-08	1.6122e-07
rs6815814	4	38816338	C	A	0.051213	0.00700033	2.55853e-13	7.3158	0.005	0.0078	0.5208	0.641026	1.4382e-12	0.0239697
rs11099097	4	81167309	T	C	-0.00881417	0.00729998	0.227269	-1.20742	0.043	0.0072	2.899e-09	5.97222	4.91283e-09	3.06976e-08
rs6854739	4	84367759	T	A	-0.0418626	0.0059721	2.38846e-12	-7.00969	-0.0091	0.0067	0.1723	-1.35821	1.28311e-11	0.00389441
rs10022462	4	89243818	T	C	0.0362328	0.0060186	1.74278e-09	6.02013	0.0116	0.0067	0.08541	1.73134	8.07679e-09	0.00245894
rs62331150	4	106069013	T	G	0.0444999	0.00711916	4.08531e-10	6.25073	0.0043	0.0081	0.5904	0.530864	1.96013e-09	0.0558034
rs1375299	4	111453660	T	G	0.0102061	0.00941561	0.278384	1.08396	0.0711	0.01	1.541e-12	7.11	4.57253e-12	8.32956e-13
rs2595117	4	111595516	T	C	-0.00931927	0.00649265	0.151185	-1.43536	-0.1422	0.0073	1.257e-84	-19.4795	7.74976e-83	1.12695e-82
rs62337205	4	111650325	G	A	-0.00352632	0.017216	0.837706	-0.204828	-0.2015	0.0173	2.291e-31	-11.6474	2.57661e-30	5.81773e-30
rs17042088	4	111654814	T	C	-0.0169124	0.00947013	0.0741213	-1.78586	0.4095	0.0103	0	39.7573	0	0
rs6838973	4	111765495	T	C	0.000696559	0.00645592	0.914079	0.107895	-0.1514	0.0067	1.03e-111	-22.597	4.4775e-111	8.98977e-107
rs297006	4	112006917	G	A	0.00491436	0.00683473	0.472124	0.719028	-0.0518	0.0071	2.15e-13	-7.29577	1.66426e-12	4.10602e-12
rs55754224	4	114428714	T	C	-0.0015489	0.00719804	0.829625	-0.215183	0.0554	0.0075	2.154e-13	7.38667	8.55225e-13	9.71967e-13
rs77528541	4	126843504	T	G	-0.05492	0.00928645	3.33918e-09	-5.91399	0.0041	0.0105	0.6945	0.390476	1.52289e-08	0.346465
rs10213171	4	148937537	G	C	0.0139378	0.0124656	0.263526	1.1181	0.091	0.0134	1.323e-11	6.79104	3.79293e-11	7.22626e-12
rs10520260	4	174447349	G	A	-0.000671389	0.00670894	0.920286	-0.100074	-0.0457	0.0073	3.362e-10	-6.26027	1.84651e-09	9.98887e-10
rs74500426	4	174642789	T	G	0.00764525	0.0119508	0.522349	0.639728	-0.0921	0.0127	4.288e-13	-7.25197	2.28725e-12	4.89448e-12
rs7697216	4	175828036	C	T	0.102627	0.00943893	1.55451e-27	10.8727	0	0.0101	0.9989	0	1.49638e-26	0.0151444
rs62641919	5	345109	C	T	0.0809368	0.0131721	8.01863e-10	6.14456	0.0251	0.0222	0.2591	1.13063	3.78647e-09	0.0134346
rs6554679	5	1236690	C	T	0.0421862	0.00724673	5.83516e-09	5.82141	0.004	0.0081	0.6225	0.493827	2.62413e-08	0.0749701
rs10054203	5	1279964	C	G	0.0393151	0.00622635	2.71379e-10	6.3143	0.007	0.0072	0.3306	0.972222	1.31453e-09	0.0184765
rs2853669	5	1295349	G	A	-0.0673087	0.00665239	4.59822e-24	-10.118	0.0005	0.0077	0.943	0.0649351	3.93534e-23	0.0280092
rs12652713	5	16228197	G	A	-0.0421205	0.0060254	2.73949e-12	-6.99048	-0.0009	0.0067	0.894	-0.134328	1.46751e-11	0.0905988
rs75442098	5	44498735	A	C	-0.0998893	0.0173382	8.3503e-09	-5.76123	0.0305	0.0218	0.1621	1.39908	3.72102e-08	0.9415
rs10941679	5	44706498	G	A	0.132852	0.0068353	3.82012e-84	19.4361	-0.0146	0.0078	0.06096	-1.87179	1.78806e-82	0.0116736
rs62367713	5	45775010	A	G	0.0830511	0.0131262	2.49739e-10	6.32714	0.0045	0.0146	0.7596	0.308219	1.21204e-09	0.0866855
rs72765759	5	45846620	T	C	-0.0687769	0.00922901	9.17642e-14	-7.45225	0.0036	0.0117	0.7588	0.307692	5.26346e-13	0.172064
rs139331653	5	45939294	A	G	0.113312	0.0183728	6.94234e-10	6.1674	-0.0562	0.024	0.01952	-2.34167	3.28951e-09	0.368557
rs27279	5	50238519	T	C	-0.0428783	0.00654249	5.60818e-11	-6.55382	0.0124	0.0071	0.07911	1.74648	2.8155e-10	0.814894
rs114414434	5	51438551	C	T	0.0499149	0.0133773	0.000190477	3.73132	-0.0706	0.0142	7.258e-07	-4.97183	4.15294e-08	6.3116e-05
rs7378815	5	55657706	T	C	-0.0560243	0.00939145	2.43959e-09	-5.96545	-0.0126	0.0099	0.2033	-1.27273	1.12131e-08	0.0101641
rs889310	5	55965167	T	C	0.0394447	0.00627797	3.3201e-10	6.28304	-0.0059	0.0067	0.3785	-0.880597	1.60071e-09	0.584146
rs12653202	5	56016918	C	A	0.173916	0.00800214	9.85044e-105	21.7337	0.0061	0.0089	0.4898	0.685393	7.7413e-103	3.35863e-08
rs2408652	5	56271185	A	G	-0.0565338	0.00734792	1.42768e-14	-7.69385	-0.0111	0.0081	0.1693	-1.37037	8.487e-14	0.00227888
rs17732378	5	56293009	A	G	0.0369656	0.00611023	1.45042e-09	6.04978	-0.0098	0.0069	0.1522	-1.42029	6.75197e-09	0.97643
rs1498608	5	58343067	A	T	-0.0642689	0.0103479	5.27203e-10	-6.21079	-0.0053	0.0114	0.6436	-0.464912	2.5144e-09	0.0658395
rs4081859	5	81466669	A	G	0.0529539	0.00700811	4.15381e-14	7.55609	0.0058	0.0078	0.4532	0.74359	2.41944e-13	0.0159079
rs332529	5	90789470	A	G	-0.0640713	0.00854853	6.62908e-14	-7.49501	-0.0141	0.009	0.1172	-1.56667	3.82648e-13	0.00138526
rs6596717	5	106427609	A	C	0.0145781	0.00624636	0.0196034	2.33385	-0.0404	0.0068	3e-09	-5.94118	1.07888e-09	1.47554e-07
rs337705	5	113737062	G	T	-0.00476915	0.00634188	0.452046	-0.752008	0.0564	0.0068	1.634e-16	8.29412	7.10833e-16	2.8601e-15
rs4076057	5	114386094	T	A	0.00019321	0.00598434	0.974244	0.0322859	-0.0394	0.0066	2.926e-09	-5.9697	1.09322e-08	6.7321e-09
rs1035407	5	128181345	C	G	-0.0163074	0.00765836	0.0332249	-2.12935	0.0504	0.0086	5.334e-09	5.86047	2.41417e-09	1.76248e-07
rs17171711	5	137364795	T	C	0.00172245	0.00797255	0.828951	0.216048	0.1086	0.0087	1.95e-35	12.4828	1.1579e-34	3.69175e-34
rs72804710	5	142880532	C	G	-0.0202124	0.00778445	0.00941773	-2.59651	0.0733	0.0086	1.921e-17	8.52326	3.30554e-18	1.28188e-14
rs11135046	5	158230013	T	G	-0.069547	0.00599661	4.23166e-31	-11.5977	-0.0132	0.0067	0.04793	-1.97015	4.57214e-30	6.58881e-06
rs12188351	5	168386089	A	G	0.0350677	0.0131446	0.00763413	2.66784	0.0865	0.0145	2.516e-09	5.96552	7.79098e-10	1.58873e-10
rs10074269	5	169591460	C	T	0.0392154	0.00643387	1.09339e-09	6.09514	-0.0124	0.0072	0.08202	-1.72222	5.12483e-09	0.754282
rs6882776	5	172664163	A	G	-0.00301984	0.00664603	0.649553	-0.454383	-0.0711	0.0074	9.637e-22	-9.60811	5.8492e-21	3.58697e-21
rs56180201	5	173392960	T	G	-0.0245908	0.0062373	8.06248e-05	-3.94254	-0.0468	0.0068	8.091e-12	-6.88235	2.13191e-13	3.65109e-14
rs418053	6	13713366	C	G	-0.0483274	0.00606186	1.5565e-15	-7.97238	0.0064	0.0067	0.3412	0.955224	9.64237e-15	0.394124
rs3819405	6	16399557	T	C	-0.0423975	0.00669334	2.38457e-10	-6.33428	0.0044	0.0073	0.5476	0.60274	1.15852e-09	0.407126
rs73366713	6	16415751	A	G	0.0138733	0.009255	0.133873	1.499	-0.1035	0.0099	1.531e-25	-10.4545	5.58242e-25	8.30393e-23
rs34969716	6	18210109	A	G	3.94725e-05	0.00758487	0.995848	0.00520412	0.0702	0.0078	1.595e-19	9	1.62979e-18	2.08879e-18
rs2223621	6	20621238	C	T	-0.0375085	0.00625419	2.00574e-09	-5.99734	-0.0033	0.0069	0.6274	-0.478261	9.26352e-09	0.0711041
rs7760611	6	21903533	C	T	0.0362718	0.00600349	1.52419e-09	6.04178	0.0051	0.0067	0.4445	0.761194	7.08683e-09	0.036631
rs730506	6	36645968	C	G	0.0206588	0.00741738	0.00534976	2.78518	-0.0618	0.0084	2.286e-13	-7.35714	2.90528e-14	6.50758e-11
rs12211255	6	76188330	A	C	0.0235692	0.0102811	0.0218778	2.29248	0.0582	0.0107	5.061e-08	5.43925	2.95479e-08	6.59081e-09
rs1836962	6	81105862	G	T	0.0392559	0.0060674	9.80202e-11	6.46997	-0.0049	0.0067	0.4671	-0.731343	4.85979e-10	0.462811
rs1361549	6	82287685	A	G	-0.0496588	0.00607915	3.11712e-16	-8.16871	-0.0195	0.0069	0.004688	-2.82609	1.98809e-15	4.81222e-06
rs2031522	6	87821501	G	A	-0.00579953	0.0061932	0.349049	-0.936435	-0.0436	0.0068	1.465e-10	-6.41176	5.75702e-10	1.16573e-10
rs210628	6	117878313	C	G	-0.0173234	0.00706822	0.0142507	-2.45088	-0.0434	0.0076	1.086e-08	-5.71053	4.96934e-09	1.05941e-09
rs9481842	6	118974798	G	T	-0.0183351	0.00688168	0.00771391	-2.66434	0.0713	0.0075	3.506e-21	9.50667	3.66609e-22	5.20931e-18
rs9401427	6	121931693	A	C	0.00311406	0.00966488	0.747298	0.322204	-0.0662	0.0108	8.917e-10	-6.12963	4.15008e-09	3.90376e-09
rs72966339	6	122398241	T	C	-0.00032723	0.006267	0.958358	-0.0522148	-0.0616	0.0069	7.422e-19	-8.92754	3.11122e-18	3.54761e-18
rs4339481	6	130382653	T	A	0.0451674	0.00638728	1.53317e-12	7.07146	-0.018	0.0071	0.01146	-2.53521	8.31211e-12	0.375934
rs117984853	6	149399100	T	G	0.00490685	0.012625	0.697528	0.38866	0.1228	0.012	1.342e-24	10.2333	1.22488e-23	1.045e-23
rs60954078	6	151955914	G	A	0.178097	0.0113187	8.74017e-56	15.7347	0.0163	0.0174	0.3465	0.936782	1.93866e-54	9.60235e-06
rs6904031	6	152055978	T	A	0.1351	0.0120694	4.38177e-29	11.1936	-0.0042	0.0136	0.7608	-0.308824	4.43769e-28	0.0277855
rs2813549	6	152441239	T	C	0.0589316	0.00707365	8.00624e-17	8.33115	-0.0052	0.0079	0.5065	-0.658228	5.2311e-16	0.22205
rs55734480	7	14372009	A	G	0.0111963	0.00727547	0.123825	1.53891	0.0548	0.0078	2.201e-12	7.02564	3.97423e-12	7.21868e-13
rs6948592	7	28408309	C	T	-0.0181782	0.0064133	0.00459032	-2.83446	-0.0426	0.007	9.988e-10	-6.08571	2.87373e-10	5.72683e-11
rs35005436	7	74134911	C	T	0.0418555	0.008266	4.11475e-07	5.06357	0.0612	0.0097	3.342e-10	6.30928	2.06538e-12	3.7014e-13
rs56201652	7	92278116	A	G	0.0231824	0.00662881	0.000470147	3.49721	-0.0531	0.0075	1.743e-12	-7.08	6.14779e-14	1.04068e-09
rs2188648	7	94111956	C	T	0.0486264	0.0066291	2.21239e-13	7.33529	0.017	0.0073	0.01993	2.32877	1.24722e-12	9.49847e-05
rs71559437	7	101552440	A	G	-0.0578055	0.00950436	1.18698e-09	-6.08199	0.0274	0.0154	0.07499	1.77922	5.55252e-09	0.71037
rs11773845	7	116191301	A	C	0.00482398	0.0060886	0.428188	0.792297	0.1054	0.0067	2.39e-55	15.7313	2.04452e-54	5.23772e-54
rs55985730	7	128417044	G	T	0.00455203	0.0147076	0.75694	0.309501	0.0867	0.0149	5.236e-09	5.81879	2.66457e-08	1.02166e-08
rs12706954	7	130656911	T	C	-0.0431577	0.00638984	1.43716e-11	-6.75411	0.0135	0.0071	0.05626	1.90141	7.43328e-11	0.73384
rs68056147	7	130674481	A	G	0.0527525	0.00668418	2.97049e-15	7.89214	-0.0062	0.0075	0.4091	-0.826667	1.81844e-14	0.337437
rs11977670	7	139942304	A	G	0.0530617	0.00608249	2.69321e-18	8.72367	-0.006	0.0067	0.3687	-0.895522	1.86574e-17	0.281012
rs62485509	7	144048902	T	G	-0.05172	0.00759773	9.94476e-12	-6.8073	0.0061	0.0159	0.7018	0.383648	5.18445e-11	0.251106
rs7789146	7	150661409	A	G	0.00527451	0.00835908	0.528046	0.630992	-0.0584	0.0087	2.116e-11	-6.71264	9.82489e-11	1.70128e-10
rs35620480	8	11499908	C	A	0.00680184	0.0085765	0.427732	0.793079	0.054	0.0092	5.152e-09	5.86957	1.81286e-08	3.99278e-09
rs7508	8	17913970	A	G	-0.0175934	0.00666706	0.00831874	-2.63885	0.0711	0.0075	1.691e-21	9.48	5.02665e-22	6.21854e-18
rs7834729	8	21821778	T	G	-0.0222778	0.00960735	0.0204044	-2.31883	-0.0653	0.0104	3.553e-10	-6.27885	1.78179e-10	3.51259e-11
rs7463114	8	29507094	C	T	-0.0596971	0.00635939	6.15878e-21	-9.38725	-0.0032	0.0071	0.647	-0.450704	4.71436e-20	0.011235
rs4286946	8	36849946	G	C	-0.0791666	0.00804364	7.41236e-23	-9.84213	0.0014	0.0089	0.8741	0.157303	6.08067e-22	0.040784
rs1511243	8	76230943	G	A	0.0778243	0.00799684	2.20497e-22	9.73187	0.0006	0.0088	0.9417	0.0681818	1.7786e-21	0.0250688
rs72658071	8	76305785	T	A	0.11744	0.0103443	7.16209e-30	11.353	-0.0217	0.0119	0.06926	-1.82353	7.44029e-29	0.445416
rs1533366	8	76378165	T	G	-0.0435017	0.00628086	4.32687e-12	-6.92607	-0.0022	0.0069	0.7519	-0.318841	2.29581e-11	0.0632725
rs62517052	8	102483100	C	T	0.0666462	0.0102388	7.55517e-11	6.5092	-0.0093	0.0114	0.4173	-0.815789	3.7678e-10	0.508691
rs12546444	8	106358620	T	A	-0.0717884	0.0105633	1.0754e-11	-6.79603	0.0113	0.0115	0.3278	0.982609	5.59697e-11	0.573608
rs13267382	8	117209548	G	A	-0.0429549	0.00627535	7.64612e-12	-6.84503	0.0029	0.0072	0.6857	0.402778	4.0085e-11	0.255331
rs62521286	8	124551975	G	A	0.0376534	0.0124768	0.00254568	3.01786	0.1202	0.0135	4.498e-19	8.9037	7.90355e-20	1.04121e-20
rs59498777	8	124609198	A	T	0.0722441	0.0106837	1.36003e-11	6.7621	0.0254	0.0119	0.03352	2.13445	7.04273e-11	0.0003357
rs970822	8	124738742	T	C	0.0428803	0.00614016	2.87754e-12	6.98358	-0.0064	0.0068	0.3476	-0.941176	1.53988e-11	0.518973
rs10096351	8	128372172	G	A	0.105937	0.00602738	3.7679e-69	17.5759	-0.0004	0.0067	0.9582	-0.0597015	1.1959e-67	0.000109595
rs1016578	8	129199566	A	G	0.0632004	0.00789633	1.20675e-15	8.00376	-0.002	0.009	0.8242	-0.222222	7.51056e-15	0.11597
rs6994744	8	141740868	C	A	-0.0083422	0.006008	0.164981	-1.38851	0.0405	0.0066	1.095e-09	6.13636	1.38785e-09	1.54436e-08
rs3217992	9	22003223	T	C	-0.0534828	0.00620242	6.52849e-18	-8.62289	0.0082	0.0069	0.2338	1.18841	4.45507e-17	0.440857
rs186999669	9	97003070	G	A	-0.0105877	0.00699451	0.130099	-1.51371	0.0719	0.0124	6.497e-09	5.79839	8.72046e-09	1.15829e-07
rs10821415	9	97713459	A	C	-0.00731637	0.00612662	0.232402	-1.19419	0.0821	0.0067	2.924e-34	12.2537	1.92912e-33	2.34229e-31
rs55760189	9	110298930	G	A	0.0530168	0.00911433	5.99614e-09	5.81687	0.0032	0.0102	0.7541	0.313725	2.69466e-08	0.108602
rs10978911	9	110306944	C	G	0.078984	0.00877357	2.2065e-19	9.00249	0.0205	0.0103	0.0479	1.99029	1.5938e-18	7.93412e-05
rs10816625	9	110837073	G	A	0.112218	0.0122205	4.20287e-20	9.18273	-0.0113	0.0138	0.4104	-0.818841	3.11928e-19	0.20942
rs1999456	9	110877304	G	C	0.0453561	0.00600738	4.3504e-14	7.55007	0.0065	0.0068	0.3432	0.955882	2.53169e-13	0.00889402
rs630965	9	110885479	T	C	0.100711	0.00619448	1.95403e-59	16.2582	0.0091	0.0068	0.1818	1.33824	4.78673e-58	8.08802e-07
rs1895062	9	119313486	G	A	-0.0430155	0.00614287	2.51426e-12	-7.00251	-0.003	0.0068	0.6518	-0.441176	1.34926e-11	0.0462285
rs10760444	9	129396434	A	G	-0.0345474	0.00602169	9.6276e-09	-5.73716	-0.0108	0.0067	0.1073	-1.61194	4.27451e-08	0.00438523
rs2274115	9	139094773	G	A	0.0148511	0.00695455	0.0327241	2.13545	0.0487	0.0076	1.691e-10	6.40789	1.01478e-10	1.97554e-11
rs67801543	10	9108324	T	C	0.0574962	0.00913613	3.10828e-10	6.29328	0.013	0.01	0.1947	1.3	1.50089e-09	0.00758629
rs7072776	10	22032942	G	A	-0.062764	0.00661974	2.51027e-21	-9.48134	-0.011	0.0074	0.1387	-1.48649	1.94914e-20	0.000365977
rs55716112	10	22521736	G	T	0.142349	0.0193955	2.14716e-13	7.3393	0.0202	0.024	0.4008	0.841667	1.21117e-12	0.0139729
rs12260388	10	22863425	G	A	0.0950819	0.0161233	3.69746e-09	5.89719	-0.0307	0.0184	0.09489	-1.66848	1.68201e-08	0.760395
rs10995201	10	64299890	G	A	-0.125077	0.00845449	1.59676e-49	-14.7942	0.0068	0.0093	0.4615	0.731183	2.97769e-48	0.00948759
rs12245149	10	65321147	A	C	0.0245743	0.00598347	4.0076e-05	4.10704	-0.047	0.0067	1.664e-12	-7.01493	3.18388e-14	3.55794e-09
rs7915134	10	75420180	T	C	-0.0238157	0.00860252	0.00563231	-2.76845	-0.1168	0.0095	1.42e-34	-12.2947	3.75162e-35	2.95911e-36
rs10458662	10	77936670	G	T	0.0062291	0.00808223	0.440875	0.770716	0.0544	0.0088	6.932e-10	6.18182	2.98497e-09	6.28476e-10
rs719338	10	80851257	T	G	-0.0780105	0.00611462	2.81227e-37	-12.758	-0.0054	0.0068	0.4271	-0.794118	3.67732e-36	0.000292067
rs10762849	10	80886061	T	C	0.0780348	0.00805793	3.51873e-22	9.68422	0.0052	0.0091	0.5705	0.571429	2.81778e-21	0.00654731
rs3781295	10	104140602	A	G	0.0011706	0.00618595	0.849908	0.189236	0.0493	0.0068	5.431e-13	7.25	2.32006e-12	1.32307e-12
rs11492754	10	105293723	C	T	0.00636296	0.00717036	0.374865	0.887398	-0.0549	0.0078	1.993e-12	-7.03846	8.92463e-12	3.01841e-11
rs11598047	10	105342672	G	A	0.00353314	0.00838256	0.6734	0.421487	0.1537	0.009	8.952e-66	17.0778	6.24217e-64	1.3132e-62
rs41287510	10	105354833	G	A	-0.0266494	0.0180239	0.139259	-1.47856	0.1056	0.0188	1.934e-08	5.61702	2.6083e-08	2.87506e-07
rs35176054	10	105480387	A	T	0.0137652	0.00911557	0.131023	1.51008	0.1391	0.01	3.207e-44	13.91	8.77472e-43	1.06361e-43
rs10749053	10	112576695	C	T	-0.00952139	0.0102527	0.353062	-0.928667	-0.0555	0.0097	1.049e-08	-5.72165	3.5177e-08	7.88237e-09
rs10885405	10	114777670	T	C	0.0453936	0.00598398	3.30292e-14	7.58586	-0.0171	0.0067	0.0105	-2.55224	1.93233e-13	0.43125
rs12250948	10	115128491	C	T	-0.053856	0.00720579	7.78002e-14	-7.47399	-0.0012	0.0082	0.8867	-0.146341	4.47688e-13	0.0699952
rs9421410	10	123095209	A	G	-0.0465369	0.0064512	5.44566e-13	-7.21369	0.0004	0.0114	0.9743	0.0350877	3.01521e-12	0.114709
rs72832307	10	123148822	T	C	0.0630594	0.0106596	3.30387e-09	5.91574	0.0085	0.0113	0.4529	0.752212	1.50719e-08	0.0400762
rs2420941	10	123229626	G	T	-0.0382337	0.00606776	2.9549e-10	-6.30113	0.0153	0.0077	0.04879	1.98701	1.42851e-09	0.599962
rs41302285	10	123333176	A	G	-0.178513	0.0278862	1.5385e-10	-6.40151	0.0432	0.0319	0.176	1.35423	7.55022e-10	0.909824
rs2936870	10	123348902	C	T	-0.238312	0.00607471	0	-39.2302	0.0281	0.0068	3.752e-05	4.13235	0	2.0782e-06
rs79615811	10	123387676	C	T	0.146564	0.0183898	1.58876e-15	7.96984	0.0176	0.0211	0.403	0.834123	9.83854e-15	0.00955631
rs74735238	10	123555062	A	T	0.0942722	0.0126309	8.41874e-14	7.4636	-0.0045	0.0156	0.7726	-0.288462	4.83698e-13	0.165491
rs6597981	11	803017	G	A	0.0451935	0.00599275	4.65113e-14	7.54135	0.0096	0.0067	0.1535	1.43284	2.70322e-13	0.00208447
rs1973765	11	1898664	C	T	-0.076616	0.00616325	1.77162e-35	-12.4311	0.0301	0.007	1.63e-05	4.3	2.19359e-34	0.160287
rs4757877	11	20010291	G	A	-0.00365152	0.00716653	0.610385	-0.509524	-0.0723	0.0078	2.931e-20	-9.26923	1.40982e-19	7.05264e-20
rs3892696	11	65582341	C	G	-0.0441903	0.00598839	1.59095e-13	-7.37932	0.0038	0.0067	0.57	0.567164	9.02754e-13	0.272637
rs148893083	11	69072697	T	C	0.156115	0.0224018	3.19508e-12	6.96886	0.0305	0.0259	0.2394	1.17761	1.70609e-11	0.00689529
rs506516	11	69306595	G	T	0.0574374	0.00638145	2.24313e-19	9.00069	0.0014	0.0071	0.8459	0.197183	1.61981e-18	0.0276347
rs78540526	11	69331418	T	C	0.281315	0.0108802	2.09445e-147	25.8558	0.0315	0.0128	0.01387	2.46094	4.65979e-145	3.11094e-16
rs4935786	11	121661507	A	T	-0.0147119	0.00705148	0.0369458	-2.08636	-0.0463	0.0079	4.854e-09	-5.86076	3.34178e-09	7.05536e-10
rs76097649	11	128764570	A	G	-0.00318682	0.0125074	0.798881	-0.254796	0.1151	0.0124	1.26e-20	9.28226	1.25009e-19	2.99858e-19
rs11822830	11	129461016	G	A	0.0464827	0.00610738	2.72162e-14	7.61091	0.0106	0.0068	0.1212	1.55882	1.59816e-13	0.00130005
rs12422552	12	14413931	C	G	0.0583695	0.00678886	8.12377e-18	8.59783	-0.0013	0.0077	0.8637	-0.168831	5.523e-17	0.0789961
rs721094	12	24728831	A	G	-0.0162445	0.00802744	0.0430093	-2.02362	0.0583	0.0091	1.188e-10	6.40659	9.17608e-11	7.58448e-09
rs4246224	12	24784139	A	G	-0.00550507	0.00892168	0.537206	-0.617044	-0.0988	0.0095	2.968e-25	-10.4	2.21654e-24	1.17886e-24
rs17380837	12	26345526	T	C	0.00367385	0.00669131	0.582972	0.549048	-0.0501	0.0072	4.799e-12	-6.95833	1.83571e-11	3.06649e-11
rs111798596	12	28045047	G	A	-0.134868	0.0211445	1.78927e-10	-6.37842	-0.0021	0.021	0.9185	-0.1	8.75063e-10	0.127975
rs7297051	12	28174817	T	C	-0.12341	0.00711743	2.38404e-67	-17.3391	0.0143	0.0079	0.07058	1.81013	7.21563e-66	0.0345697
rs11049431	12	28347382	T	C	-0.0683464	0.0074213	3.27643e-20	-9.2095	0.0181	0.0124	0.1443	1.45968	2.44154e-19	0.523461
rs1027113	12	29140260	A	G	0.0747708	0.0109239	7.66512e-12	6.84467	-0.0148	0.012	0.216	-1.23333	4.01825e-11	0.741538
rs12809354	12	32978437	C	T	0.00618357	0.00880088	0.4823	0.702609	0.0718	0.0094	2.886e-14	7.6383	1.29776e-13	3.3474e-14
rs4788	12	57106660	T	A	-0.0149405	0.00679553	0.0279084	-2.19857	-0.0531	0.0075	1.756e-12	-7.08	9.2888e-13	1.63793e-13
rs71454237	12	70013415	A	G	-0.00242887	0.00765579	0.751047	-0.317259	-0.062	0.0084	1.784e-13	-7.38095	8.91995e-13	4.23573e-13
rs808980	12	70021122	A	G	0.0178161	0.00657367	0.00672391	2.71022	-0.0385	0.0073	1.278e-07	-5.27397	3.18711e-08	6.10423e-06
rs12426679	12	76237987	T	C	0.00704524	0.00596962	0.237928	1.18018	-0.0391	0.0067	4.945e-09	-5.83582	1.13935e-08	6.27208e-08
rs202049448	12	85009437	C	T	-0.0392024	0.00672768	5.64232e-09	-5.82703	0.0357	0.0176	0.04228	2.02841	2.53957e-08	0.502464
rs17356907	12	96027759	G	A	-0.0881193	0.00658679	8.11071e-41	-13.3782	-0.0086	0.0074	0.2449	-1.16216	1.17829e-39	3.81104e-05
rs11065822	12	111600134	T	G	-0.0369321	0.00634569	5.88401e-09	-5.82002	-0.019	0.0075	0.01097	-2.53333	2.64554e-08	0.000167573
rs883079	12	114793240	T	C	0.00102176	0.00686358	0.881658	0.148868	0.0981	0.0074	2.837e-40	13.2568	5.86706e-39	3.31361e-38
rs1061657	12	115108136	C	T	0.0437015	0.00690849	2.5197e-10	6.32577	0.0346	0.0079	1.117e-05	4.37975	1.22262e-09	1.41284e-08
rs2464264	12	115835798	A	G	-0.0833276	0.00608108	9.77132e-43	-13.7028	-0.0039	0.0068	0.5619	-0.573529	1.5014e-41	0.000295976
rs116904997	12	120668534	A	G	0.0651346	0.0211299	0.0020521	3.08259	-0.1412	0.0265	9.367e-08	-5.3283	1.37431e-08	7.04287e-06
rs10773657	12	123327900	A	C	-0.0172785	0.00995244	0.0825448	-1.73611	-0.0575	0.0103	2.537e-08	-5.58252	2.70746e-08	6.02535e-09
rs9506925	13	23368943	T	C	-0.00595481	0.00675143	0.377773	-0.882007	0.0449	0.0075	2.716e-09	5.98667	7.29211e-09	1.86421e-08
rs56404467	13	32839990	A	G	0.142656	0.0228142	4.02775e-10	6.25295	-0.019	0.0296	0.5209	-0.641892	1.93315e-09	0.439686
rs17181761	13	73811471	C	A	0.0426162	0.00641153	2.99533e-11	6.6468	0.005	0.0071	0.4856	0.704225	1.52472e-10	0.0300359
rs4885096	13	73967507	C	T	0.0375168	0.0064886	7.38402e-09	5.78195	0.0152	0.0079	0.05319	1.92405	3.30082e-08	0.00156409
rs365990	14	23861811	G	A	0.0149102	0.00621485	0.016434	2.39913	0.0433	0.0069	4.561e-10	6.27536	1.618e-10	3.1828e-11
rs1957021	14	32924505	C	T	-0.00837617	0.00723908	0.247241	-1.15708	0.0583	0.008	2.274e-13	7.2875	9.73202e-13	8.63591e-12
rs11156751	14	32990437	C	T	0.00191553	0.00743119	0.796585	0.257769	0.0719	0.0077	6.941e-21	9.33766	7.48233e-20	6.41248e-20
rs73241997	14	35173775	T	C	-0.0021229	0.00861763	0.805416	-0.246344	0.0733	0.0093	2.942e-15	7.88172	1.97367e-14	2.76593e-14
rs7149262	14	37136545	A	C	-0.072454	0.00740271	1.27411e-22	-9.7875	0.0062	0.0083	0.4557	0.746988	1.03651e-21	0.144254
rs2253012	14	37228504	T	C	0.0387985	0.00624001	5.04489e-10	6.2177	-0.0013	0.0068	0.8505	-0.191176	2.40856e-09	0.228935
rs2738413	14	64679960	G	A	0.00384982	0.00608243	0.526772	0.632941	-0.0778	0.0067	2.546e-31	-11.6119	3.88114e-30	7.19483e-29
rs12894297	14	68650548	A	C	-0.0605996	0.00798119	3.13045e-14	-7.59281	-0.0019	0.0089	0.8328	-0.213483	1.83331e-13	0.05694
rs11624333	14	68979835	C	T	-0.0955532	0.00690621	1.54915e-43	-13.8358	-0.0133	0.0076	0.07757	-1.75	2.43615e-42	1.64737e-06
rs74884082	14	73249419	T	C	-0.00162883	0.00706752	0.81773	-0.230466	-0.0493	0.0078	3.479e-10	-6.32051	1.26396e-09	5.74434e-10
rs10873298	14	77426525	T	C	0.00479766	0.00652483	0.462161	0.735293	-0.0401	0.0069	7.072e-09	-5.81159	2.4793e-08	4.09525e-08
rs10139533	14	91734812	G	T	-0.0450734	0.00749373	1.80084e-09	-6.01482	-0.0064	0.0082	0.4306	-0.780488	8.33918e-09	0.0355016
rs941764	14	91841069	G	A	0.0492318	0.00627044	4.11401e-15	7.85141	0.0063	0.0071	0.3716	0.887324	2.50333e-14	0.00887699
rs78440108	14	93070286	T	C	-0.0614423	0.00812249	3.89454e-14	-7.56447	-0.0191	0.009	0.03406	-2.12222	2.27125e-13	0.000174439
rs4983544	14	105213978	G	T	0.0367197	0.0061254	2.03905e-09	5.99467	-0.0032	0.0068	0.6329	-0.470588	9.41356e-09	0.377997
rs7170477	15	64103777	A	G	-0.0191836	0.00676699	0.00458426	-2.83488	0.0393	0.0072	4.977e-08	5.45833	9.24944e-09	2.95156e-06
rs74022964	15	73677264	T	C	-0.0132293	0.008123	0.103394	-1.62862	0.1132	0.009	3.51e-36	12.5778	1.86677e-35	1.77154e-32
rs12908004	15	80676925	G	A	-0.00151806	0.00834058	0.855576	-0.182008	0.0732	0.009	4.115e-16	8.13333	2.64977e-15	3.60765e-15
rs1407588	15	81052947	A	G	-0.00775757	0.00610496	0.203836	-1.2707	0.0387	0.0067	8.505e-09	5.77612	1.41233e-08	9.68199e-08
rs12594752	15	91531995	T	C	-0.076607	0.00888794	6.74208e-18	-8.6192	0.0042	0.0096	0.6608	0.4375	4.59829e-17	0.133595
rs6598541	15	99271135	G	A	-0.0213118	0.0062713	0.00067802	-3.39832	-0.0438	0.0069	2.223e-10	-6.34783	2.21075e-11	4.16319e-12
rs140185678	16	2003016	A	G	0.0222208	0.0242461	0.35942	0.916471	0.1659	0.0218	2.434e-14	7.61009	1.60818e-13	2.86066e-14
rs2815301	16	2004718	C	T	-0.00943103	0.00780058	0.226656	-1.20902	0.0504	0.0085	3.79e-09	5.92941	6.31524e-09	3.89764e-08
rs77316573	16	2265271	T	C	-0.0110137	0.00794002	0.165406	-1.38712	0.0529	0.0089	3.265e-09	5.94382	4.45415e-09	4.50921e-08
rs2601774	16	4027749	G	A	0.0503196	0.00837809	1.90051e-09	6.00609	0.0153	0.0092	0.0947	1.66304	8.78912e-09	0.00308839
rs1076479	16	52512456	T	C	0.040357	0.00630998	1.59759e-10	6.39575	0.0013	0.0069	0.8475	0.188406	7.83345e-10	0.106968
rs4784227	16	52599188	T	C	0.214268	0.00686309	5.64914e-214	31.2203	-0.0033	0.0079	0.6775	-0.417722	6.0759e-211	5.09066e-11
rs62048402	16	53803223	A	G	-0.0593798	0.00609351	1.94243e-22	-9.74476	0.0293	0.0067	1.383e-05	4.37313	1.56992e-21	0.0379556
rs7184573	16	53861592	A	G	-0.0478183	0.00630013	3.19798e-14	-7.59004	0.0046	0.007	0.5141	0.657143	1.87209e-13	0.290697
rs28539243	16	54682064	A	G	0.0465434	0.00605557	1.5175e-14	7.68605	-0.0025	0.0068	0.7161	-0.367647	9.01051e-14	0.173978
rs2359171	16	73053022	A	T	-0.00521811	0.00833131	0.531102	-0.626325	0.1746	0.0086	4.65e-91	20.3023	6.94363e-90	1.50943e-85
rs7499149	16	80648327	G	A	0.0808712	0.00703623	1.42158e-30	11.4935	-0.0174	0.008	0.03001	-2.175	1.51043e-29	0.650757
rs4843504	16	87032855	C	T	0.0426333	0.00689451	6.26312e-10	6.18366	0.005	0.0075	0.5043	0.666667	2.97494e-09	0.0423938
rs7225165	17	1309850	A	G	-0.0122035	0.0104416	0.242512	-1.16873	-0.0655	0.0111	3.203e-09	-5.9009	9.17831e-09	1.98683e-09
rs9899183	17	7452977	T	C	0.00328918	0.00677092	0.627123	0.48578	0.0452	0.0075	2.017e-09	6.02667	7.76455e-09	2.39294e-09
rs72811294	17	12618680	C	G	-0.00503739	0.00955036	0.597877	-0.527456	-0.072	0.0106	9.67e-12	-6.79245	5.73457e-11	1.78594e-11
rs75637630	17	29168078	C	A	-0.0418372	0.00688394	1.22064e-09	-6.07751	-0.0381	0.0153	0.01276	-2.4902	5.70609e-09	0.000157432
rs7359623	17	38049589	T	C	0.00568659	0.00600992	0.344046	0.946201	-0.0438	0.0066	4.394e-11	-6.63636	1.18559e-10	4.33255e-10
rs55938136	17	43798360	G	A	-0.0256833	0.0125044	0.0399807	-2.05395	0.0469	0.0087	7.793e-08	5.3908	4.15229e-08	1.72736e-06
rs2696608	17	44293671	G	A	-0.0463866	0.00763578	1.24064e-09	-6.0749	0.0591	0.0097	1.124e-09	6.09278	7.65086e-13	4.94109e-06
rs2787486	17	53209774	C	A	-0.0714972	0.00657219	1.45536e-27	-10.8788	-0.0044	0.0073	0.5503	-0.60274	1.40227e-26	0.00255855
rs745570	17	77781725	G	A	-0.0385077	0.00601697	1.55523e-10	-6.39986	-0.0175	0.0067	0.009101	-2.61194	7.63042e-10	7.20437e-05
rs12962334	18	20477934	C	G	-0.0376797	0.00639568	3.82854e-09	-5.89144	0.0113	0.0071	0.1105	1.59155	1.74012e-08	0.81697
rs7240205	18	24156018	T	C	-0.0372737	0.00624124	2.34135e-09	-5.97216	0.004	0.0068	0.5533	0.588235	1.07725e-08	0.445959
rs527616	18	24337424	G	C	0.0511702	0.00620786	1.6821e-16	8.24281	-0.002	0.0071	0.7828	-0.28169	1.08471e-15	0.117
rs170801	18	24500899	A	C	-0.0634941	0.00677657	7.27695e-21	-9.36966	-0.0037	0.0073	0.6105	-0.506849	5.55547e-20	0.00971065
rs72931898	18	29981526	A	G	-0.103453	0.0144994	9.67679e-13	-7.13503	-0.0221	0.0152	0.1466	-1.45395	5.29592e-12	0.00263248
rs9954058	18	42411803	C	G	-0.0836944	0.0117971	1.29821e-12	-7.0945	0.0139	0.0128	0.2777	1.08594	7.06232e-12	0.596841
rs9952980	18	42888797	C	T	-0.0485253	0.00627795	1.07977e-14	-7.72949	-0.0046	0.007	0.5067	-0.657143	6.45272e-14	0.0179959
rs9953366	18	46474192	C	T	0.0130926	0.00658737	0.0468635	1.98753	0.049	0.0073	1.823e-11	6.71233	1.68333e-11	3.15156e-12
rs78269692	19	13158277	C	T	0.0881665	0.0144821	1.14363e-09	6.08795	-0.0175	0.0152	0.2495	-1.15132	5.35453e-09	0.809926
rs56069439	19	17393925	A	C	0.0375691	0.006535	8.982e-09	5.74891	-0.0111	0.0074	0.1335	-1.5	3.99502e-08	0.861657
rs8105994	19	18593553	C	T	-0.0708546	0.0063342	4.77247e-29	-11.186	-0.0125	0.007	0.07631	-1.78571	4.82755e-28	2.28295e-05
rs4808961	19	19577215	G	C	0.0405448	0.00624546	8.47675e-11	6.49189	-0.0121	0.007	0.08294	-1.72857	4.2165e-10	0.817671
rs56681946	19	44283031	C	T	0.0621231	0.00638754	2.34366e-22	9.72567	-0.0035	0.0072	0.623	-0.486111	1.88869e-21	0.0891342
rs61373376	19	46183586	T	C	0.0523072	0.00846022	6.30047e-10	6.18272	-0.0085	0.009	0.3453	-0.944444	2.99225e-09	0.643475
rs16991615	20	5948227	A	G	0.0752792	0.0122295	7.48242e-10	6.15554	-0.0181	0.0135	0.179	-1.34074	3.53911e-09	0.943056
rs6122906	20	48945911	G	A	0.04694	0.00774299	1.34221e-09	6.06226	-0.0111	0.0086	0.1984	-1.2907	6.26e-09	0.920938
rs13039563	20	52296849	A	G	0.042395	0.00715028	3.04541e-09	5.92913	0.0139	0.0081	0.08657	1.71605	1.3921e-08	0.00276115
rs2822999	21	16364756	G	T	0.0582584	0.00834088	2.85502e-12	6.98468	-0.0154	0.0088	0.08233	-1.75	1.52808e-11	0.887641
rs2403907	21	16574455	A	C	-0.078446	0.00649501	1.38212e-33	-12.0779	0.0086	0.0073	0.2398	1.17808	1.61452e-32	0.120516
rs2834618	21	36119111	G	T	-0.0106	0.0109723	0.334013	-0.966062	-0.0944	0.0112	3.412e-17	-8.42857	2.31962e-16	4.0512e-17
rs9808759	21	47780223	C	T	-0.0665367	0.0114299	5.83975e-09	-5.82128	0.0068	0.0131	0.6023	0.519084	2.62614e-08	0.426204
rs464901	22	18597502	C	T	-0.00834027	0.00710965	0.240759	-1.17309	-0.0508	0.0072	1.531e-12	-7.05556	5.78588e-12	1.05915e-12
rs133902	22	26164079	T	C	0.00252815	0.00634698	0.690392	0.398324	0.0419	0.0068	9.137e-10	6.16176	3.40581e-09	1.19861e-09
rs62237573	22	28552698	T	C	0.428126	0.0317561	2.00418e-41	13.4817	0.0423	0.0419	0.3129	1.00955	2.96389e-40	6.51391e-05
rs5997390	22	29135543	A	G	0.0731368	0.0104362	2.41701e-12	7.00803	0.024	0.0116	0.03808	2.06897	1.29813e-11	0.000347123
rs132365	22	29599486	C	G	-0.239977	0.0250786	1.07981e-21	-9.56896	-0.0573	0.0326	0.07888	-1.75767	8.49669e-21	0.000119702
rs738321	22	38568833	G	C	-0.0475003	0.00618327	1.56546e-14	-7.68206	0.0176	0.0069	0.01059	2.55072	9.28983e-14	0.444813
rs12628403	22	39358037	C	A	0.080637	0.0117367	6.39725e-12	6.87051	0.0148	0.0132	0.2625	1.12121	3.36649e-11	0.00866356
rs5995875	22	40960692	T	C	0.116671	0.00948887	9.57376e-35	12.2955	-0.0116	0.0108	0.2799	-1.07407	1.15911e-33	0.0886874
rs73161324	22	42038786	T	C	0.0816532	0.0129015	2.46844e-10	6.32894	-0.0505	0.0154	0.001011	-3.27922	1.19831e-09	0.0759425
rs28512361	22	46283297	A	G	0.0611708	0.0103589	3.5228e-09	5.90517	-0.0098	0.0114	0.3898	-0.859649	1.60449e-08	0.628887

## Sheet: Supplementary Table 5
Supplementary Table 5: Phewas of the newly identified pleiotropic SNPs.
SNP	beta	n	position	chr	se	p	id	rsid	ea	nea	eaf	trait
rs114414434	0.211531	23211	51438551	5	0.0267741	2.77588e-15	eqtl-a-ENSG00000152684	rs114414434	C	T	0.0518901	ENSG00000152684
	0.149984	31053	51438551	5	0.0268035	2.19862e-08	eqtl-a-ENSG00000213949	rs114414434	C	T	0.0518901	ENSG00000213949
ea: effect_allele; nea: other_allele; eaf: effect allele frequency.

## Sheet: Supplementary Table 6
Supplementary Table 6: Potential causal SNPs determined for each pleiotropic SNP using FM-summary.
Index SNP	No. of SNPs in the credible set	99% credible-set SNPs	Chromosome	Position	CumSum
rs1061657	6	rs11609105	12	115102482	0.998827
		rs12810346	12	115091017	0.977298
		rs3741698	12	115109223	0.953552
		rs1566646	12	115117029	0.896917
		rs1061651	12	115108361	0.834409
		rs12422933	12	115106688	0.622352
rs1973765	4	rs688601	11	1891284	0.99643
		rs4980389	11	1892585	0.989929
		rs4980386	11	1895708	0.953543
		rs588321	11	1896957	0.784339
rs2696608	1532	rs10451283	17	43814020	0.990207
		rs112058117	17	44041562	0.989972
		rs62054428	17	43822511	0.989737
		rs62057151	17	43903842	0.989496
		rs62062778	17	44022528	0.989253
		rs62055515	17	43956370	0.98901
		rs17652036	17	44073027	0.988766
		rs4327090	17	43902541	0.988519
		rs16940904	17	44186063	0.988272
		rs56294117	17	44042783	0.988023
		rs55668363	17	43892788	0.987773
		rs78834738	17	44022434	0.987522
		rs56194509	17	43844559	0.98727
		rs62061772	17	44169437	0.987006
		rs62061771	17	44169406	0.986734
		rs62054395	17	43811060	0.986463
		rs1526126	17	43812218	0.98619
		rs2957297	17	44368212	0.985917
		rs62054832	17	43933579	0.985641
		rs62055956	17	43854449	0.985362
		rs55943044	17	43872228	0.985081
		rs118087478	17	44051589	0.984798
		rs55657917	17	43844560	0.984515
		rs62057062	17	43856710	0.984231
		rs62062770	17	44019680	0.983946
		rs17334923	17	43827244	0.983661
		rs78917495	17	43858482	0.983374
		rs62054823	17	43929029	0.983087
		rs79730878	17	43849415	0.9828
		rs62054411	17	43812684	0.98251
		rs4471726	17	43807134	0.982218
		rs4609899	17	43807113	0.981924
		rs17577369	17	44192923	0.981628
		rs77849344	17	43840864	0.981333
		rs17652520	17	44098967	0.981037
		rs56080482	17	44032597	0.98074
		rs62055890	17	43840681	0.980443
		rs17653906	17	44133142	0.980145
		rs12373140	17	43924231	0.979847
		rs2106785	17	43919105	0.979547
		rs78872653	17	43905134	0.979245
		rs117124984	17	44051588	0.97894
		rs62057064	17	43857033	0.978635
		rs62057063	17	43856730	0.978329
		rs11079721	17	43840107	0.978022
		rs62055947	17	43852605	0.977713
		rs62055948	17	43852621	0.977402
		rs2316784	17	44021699	0.977091
		rs62057061	17	43856639	0.976779
		rs16940671	17	43908151	0.976468
		rs77044307	17	44172408	0.976156
		rs62054400	17	43812649	0.975842
		rs62054398	17	43812599	0.975528
		rs62054399	17	43812624	0.975213
		rs62054760	17	43908989	0.974899
		rs78440279	17	43816052	0.974583
		rs112102887	17	44179749	0.974266
		rs62062137	17	44118848	0.97395
		rs79545140	17	43840935	0.973632
		rs62062769	17	44019643	0.973312
		rs199439	17	44793503	0.972991
		rs62055957	17	43854536	0.97267
		rs74918686	17	43840899	0.972349
		rs62057071	17	43859691	0.972026
		rs111976319	17	44095335	0.971703
		rs62057069	17	43859065	0.971379
		rs62057070	17	43859640	0.971054
		rs538628	17	44787313	0.970728
		rs62063266	17	44033488	0.970403
		rs62057068	17	43858629	0.970077
		rs71375313	17	43839253	0.96975
		rs16940672	17	43908152	0.969423
		rs4479290	17	44021744	0.969094
		rs62055955	17	43854340	0.968765
		rs62055896	17	43844201	0.968435
		rs62054390	17	43808443	0.968105
		rs112893440	17	44179969	0.967775
		rs56109643	17	43844859	0.967444
		rs62055895	17	43844044	0.967112
		rs56113217	17	43926948	0.96678
		rs62054820	17	43926755	0.966447
		rs2066899	17	44155732	0.966114
		rs62055901	17	43845041	0.96578
		rs10221243	17	44212310	0.965447
		rs55725840	17	43844486	0.965113
		rs56189701	17	43987801	0.96478
		rs112411928	17	44139762	0.964446
		rs62060769	17	44135026	0.964112
		rs62060799	17	44144251	0.963777
		rs76830096	17	43857129	0.963442
		rs62061793	17	44171565	0.963106
		rs113934115	17	43847039	0.962769
		rs7207582	17	44210933	0.962431
		rs62054762	17	43909022	0.962092
		rs62054761	17	43909008	0.961752
		rs62055932	17	43848412	0.961411
		rs62054818	17	43926056	0.96107
		rs2902661	17	43807099	0.960727
		rs62061767	17	44167729	0.960385
		rs6503457	17	44208312	0.960043
		rs62055894	17	43843943	0.9597
		rs11575895	17	43971785	0.959357
		rs79923630	17	44167661	0.959013
		rs62062290	17	44099129	0.958669
		rs17571857	17	44035706	0.958324
		rs17573447	17	44079567	0.95798
		rs62061766	17	44167464	0.957635
		rs62054817	17	43925966	0.95729
		rs17660294	17	44167101	0.956945
		rs56040418	17	43958079	0.9566
		rs7220752	17	44138201	0.956253
		rs62062283	17	44095055	0.955906
		rs113520245	17	44033132	0.955559
		rs3912061	17	44165098	0.95521
		rs17660398	17	44170612	0.95486
		rs4283261	17	44089921	0.95451
		rs62063265	17	44033468	0.954159
		rs8077487	17	44115440	0.953808
		rs56041778	17	44147511	0.953456
		rs111853996	17	44130878	0.953105
		rs12150469	17	44092497	0.952753
		rs17563861	17	43818906	0.952401
		rs76294809	17	43849327	0.952048
		rs12150621	17	43838482	0.951694
		rs62055899	17	43844977	0.951341
		rs62054442	17	43829353	0.950987
		rs62054811	17	43918651	0.950633
		rs62060795	17	44142663	0.950278
		rs11079718	17	43839951	0.949924
		rs62064672	17	44086521	0.949569
		rs55991914	17	43854267	0.949211
		rs56269136	17	43926992	0.948853
		rs77063768	17	43925729	0.948494
		rs112197756	17	44154105	0.948135
		rs56385754	17	43927255	0.947776
		rs17690176	17	43916773	0.947416
		rs2435204	17	43988205	0.947057
		rs9897399	17	43804317	0.946697
		rs4617909	17	43806451	0.946337
		rs62055900	17	43845002	0.945976
		rs62060793	17	44142427	0.945615
		rs62054414	17	43813415	0.945254
		rs62054394	17	43810608	0.944892
		rs17575773	17	44142879	0.94453
		rs76311426	17	43818690	0.944168
		rs62054381	17	43801185	0.943805
		rs62054412	17	43813002	0.943443
		rs80020809	17	44172391	0.943081
		rs62061792	17	44171554	0.942717
		rs17660337	17	44169605	0.942354
		rs111970616	17	44169581	0.94199
		rs80157557	17	43817898	0.941626
		rs62060797	17	44143344	0.941262
		rs62054413	17	43813370	0.940898
		rs56298110	17	43815336	0.940533
		rs76421814	17	43814427	0.940168
		rs4569335	17	43811950	0.939803
		rs12150344	17	44143484	0.939438
		rs62054397	17	43811792	0.939073
		rs1526125	17	43812177	0.938708
		rs62061770	17	44169377	0.938343
		rs56387266	17	43847912	0.937977
		rs1880752	17	43806264	0.937612
		rs17649162	17	43810371	0.937246
		rs62054389	17	43808321	0.936879
		rs62054396	17	43811510	0.936513
		rs17649138	17	43808067	0.936146
		rs17563889	17	43818946	0.935779
		rs56006248	17	43815141	0.935412
		rs62060798	17	44144152	0.935045
		rs17563718	17	43811673	0.934678
		rs76728632	17	43818160	0.93431
		rs56384960	17	43817608	0.933942
		rs56178230	17	43817832	0.933575
		rs55947210	17	43808763	0.933207
		rs74348235	17	44165852	0.932839
		rs11079723	17	43841729	0.932471
		rs1526127	17	43812398	0.932103
		rs4390635	17	43809016	0.931734
		rs75986348	17	43809328	0.931366
		rs2864087	17	43807063	0.930997
		rs55972730	17	44155707	0.930628
		rs2097760	17	44168677	0.930259
		rs80072429	17	43818611	0.92989
		rs77114624	17	43818657	0.929521
		rs77555455	17	44035516	0.929151
		rs2838	17	44141347	0.928781
		rs62062282	17	44094374	0.928411
		rs76924476	17	44199029	0.92804
		rs56295996	17	43817557	0.92767
		rs62054426	17	43820741	0.927298
		rs62055550	17	43965680	0.926926
		rs17660167	17	44166311	0.926554
		rs62063279	17	44036936	0.926181
		rs62063278	17	44036914	0.925808
		rs12150551	17	44150920	0.925435
		rs17652748	17	44103616	0.925061
		rs62064675	17	44088926	0.924687
		rs62054392	17	43808945	0.924313
		rs56268325	17	43847741	0.923938
		rs3912062	17	44165069	0.923562
		rs113277432	17	44033169	0.923185
		rs62060845	17	44154393	0.922808
		rs62060859	17	44164133	0.922431
		rs17659743	17	44146165	0.922053
		rs56323408	17	44147721	0.921675
		rs62060858	17	44164090	0.921297
		rs62062296	17	44100916	0.920918
		rs112674766	17	44130924	0.92054
		rs78938131	17	44157622	0.920161
		rs62060802	17	44146336	0.919782
		rs62055889	17	43838919	0.919402
		rs55864131	17	44163411	0.919021
		rs9468	17	44101563	0.91864
		rs12185243	17	44115351	0.918259
		rs75975083	17	44146357	0.917877
		rs62061789	17	44169769	0.917495
		rs62062780	17	44022593	0.917113
		rs62064663	17	44080039	0.916731
		rs9907738	17	44151546	0.916349
		rs74571696	17	44123685	0.915966
		rs79698033	17	44123717	0.915584
		rs62063857	17	44076665	0.915201
		rs62055945	17	43851851	0.914819
		rs77965652	17	43853457	0.914436
		rs12150604	17	43828221	0.914052
		rs62060841	17	44153386	0.913669
		rs55849949	17	43853526	0.913285
		rs62057067	17	43858326	0.912901
		rs12150451	17	43827431	0.912517
		rs12150455	17	43827508	0.912132
		rs62060843	17	44153626	0.911748
		rs62060842	17	44153607	0.911363
		rs62055950	17	43853133	0.910977
		rs56043078	17	43853235	0.910592
		rs4605208	17	43794209	0.910207
		rs55690782	17	44137311	0.909821
		rs62062269	17	44091092	0.909435
		rs62055946	17	43851971	0.909049
		rs62055943	17	43851018	0.908662
		rs2532307	17	44221350	0.908275
		rs7218319	17	44126365	0.907889
		rs2316952	17	44139190	0.907501
		rs62054819	17	43926149	0.907113
		rs56318865	17	44147411	0.906725
		rs76307183	17	44142121	0.906337
		rs62064661	17	44078892	0.905948
		rs62063859	17	44078616	0.905559
		rs62060794	17	44142566	0.90517
		rs55893711	17	44119320	0.904781
		rs2316951	17	44139083	0.904391
		rs113201171	17	44082249	0.904001
		rs17654016	17	44137925	0.903611
		rs12150363	17	43826351	0.903221
		rs12150625	17	44149448	0.90283
		rs12150628	17	44149581	0.902439
		rs62061790	17	44170414	0.902047
		rs62064662	17	44079721	0.901655
		rs17659953	17	44159725	0.901263
		rs62054417	17	43815859	0.900871
		rs62054419	17	43816605	0.900478
		rs1608956	17	43815820	0.900085
		rs1608955	17	43815713	0.899692
		rs12150627	17	44149537	0.899299
		rs62062784	17	44024552	0.898906
		rs62060792	17	44141955	0.898513
		rs55896111	17	43799048	0.898118
		rs111913701	17	44159631	0.897724
		rs17660017	17	44160674	0.897329
		rs62055551	17	43965687	0.896934
		rs62060852	17	44160050	0.896539
		rs3912063	17	44165049	0.896143
		rs17573907	17	44099082	0.895747
		rs77009866	17	44110888	0.89535
		rs2004260	17	43822398	0.894954
		rs12150658	17	43826305	0.894557
		rs34303488	17	43848181	0.89416
		rs55787734	17	43799052	0.893763
		rs12150438	17	44113963	0.893366
		rs62054421	17	43816657	0.892968
		rs17576165	17	44159849	0.892571
		rs62060812	17	44151667	0.892173
		rs12150127	17	44141732	0.891774
		rs62062322	17	44112385	0.891375
		rs17576200	17	44159988	0.890976
		rs77138434	17	44159555	0.890577
		rs62060846	17	44154461	0.890177
		rs55881134	17	44109248	0.889778
		rs55915917	17	43892784	0.889378
		rs55947022	17	44147574	0.888978
		rs62054420	17	43816655	0.888578
		rs62054424	17	43819384	0.888178
		rs17653193	17	44112441	0.887778
		rs79252344	17	44120608	0.887377
		rs55929190	17	44147599	0.886977
		rs733968	17	44089715	0.886577
		rs62055928	17	43847374	0.886176
		rs62062295	17	44100906	0.885775
		rs56127309	17	43960341	0.885374
		rs111424940	17	44211502	0.884973
		rs753235	17	43946223	0.884572
		rs17660464	17	44177993	0.884171
		rs62062321	17	44111109	0.88377
		rs77747656	17	44099827	0.883368
		rs62060835	17	44152390	0.882965
		rs74481389	17	44154607	0.882562
		rs80184151	17	43879308	0.882159
		rs7687	17	44103296	0.881756
		rs17653211	17	44112638	0.881353
		rs62055903	17	43846668	0.88095
		rs733967	17	44089690	0.880546
		rs62060838	17	44153144	0.880142
		rs62059009	17	44006130	0.879738
		rs76885724	17	43850519	0.879334
		rs62062270	17	44091195	0.878931
		rs56136075	17	43936298	0.878526
		rs10445362	17	43914554	0.878122
		rs56070245	17	43847868	0.877717
		rs62063670	17	44123248	0.877311
		rs62055938	17	43849656	0.876906
		rs112950348	17	44033188	0.876501
		rs62055939	17	43849787	0.876095
		rs17659731	17	44144634	0.875688
		rs62060801	17	44145860	0.875282
		rs78229689	17	44106806	0.874875
		rs111374028	17	43846820	0.874468
		rs62054431	17	43823880	0.874061
		rs62060853	17	44160592	0.873654
		rs62062297	17	44101004	0.873246
		rs17576779	17	44178272	0.872838
		rs62062281	17	44094112	0.87243
		rs11079724	17	43841912	0.872021
		rs10514898	17	44119636	0.871612
		rs62060856	17	44161875	0.871202
		rs17575822	17	44144345	0.870792
		rs1476554	17	44159102	0.870382
		rs62060847	17	44154946	0.869972
		rs62062278	17	44093860	0.869561
		rs62055887	17	43838710	0.86915
		rs17660488	17	44178337	0.86874
		rs62055886	17	43838678	0.868329
		rs1117253	17	44149297	0.867917
		rs77925835	17	44159695	0.867506
		rs111519055	17	44159672	0.867095
		rs28439278	17	43838071	0.866684
		rs75916678	17	43849366	0.866272
		rs62055885	17	43838014	0.86586
		rs62062791	17	44025273	0.865449
		rs62061788	17	44169759	0.865037
		rs77950913	17	44146451	0.864625
		rs62060851	17	44157992	0.864213
		rs112578465	17	44125066	0.863801
		rs62063673	17	44125484	0.863388
		rs2316955	17	44161985	0.862976
		rs62060855	17	44161860	0.862563
		rs12150336	17	44125704	0.862151
		rs12150570	17	44126218	0.861738
		rs62054809	17	43918239	0.861326
		rs62060836	17	44152447	0.860913
		rs3912060	17	44165435	0.8605
		rs62062292	17	44099809	0.860087
		rs12150558	17	44151156	0.859673
		rs62062293	17	44100553	0.859259
		rs79782347	17	44146567	0.858845
		rs17653255	17	44112743	0.85843
		rs62064666	17	44082514	0.858015
		rs55787105	17	43853109	0.8576
		rs56100031	17	44155157	0.857185
		rs113793114	17	44037079	0.856769
		rs113788190	17	44161302	0.856354
		rs974291	17	44150480	0.855938
		rs62060834	17	44151697	0.855522
		rs62055940	17	43849896	0.855106
		rs62063671	17	44124837	0.85469
		rs55767267	17	43960325	0.854273
		rs62060810	17	44148674	0.853856
		rs62060768	17	44134984	0.853438
		rs17576695	17	44172327	0.85302
		rs76723223	17	44089108	0.852602
		rs62054429	17	43823125	0.852184
		rs76171147	17	43823229	0.851766
		rs62063275	17	44036287	0.851347
		rs62060800	17	44145592	0.850928
		rs62061808	17	44177337	0.850508
		rs62060839	17	44153227	0.850088
		rs62055935	17	43848750	0.849667
		rs56240678	17	44176170	0.849246
		rs62061803	17	44174513	0.848825
		rs62061802	17	44174351	0.848403
		rs62061796	17	44173408	0.847982
		rs733969	17	44089727	0.84756
		rs62061791	17	44171024	0.847139
		rs62054427	17	43821062	0.846717
		rs75641221	17	44145373	0.846295
		rs62062136	17	44116312	0.845873
		rs112596352	17	44170238	0.845451
		rs62054418	17	43816306	0.845028
		rs62054432	17	43823889	0.844605
		rs62062768	17	44019479	0.844181
		rs62062274	17	44093319	0.843758
		rs17576870	17	44180442	0.843333
		rs17576842	17	44179992	0.842907
		rs62061811	17	44180173	0.842481
		rs17690314	17	43919884	0.842055
		rs17575437	17	44133031	0.841629
		rs17334944	17	43828617	0.841203
		rs12150254	17	44090455	0.840777
		rs17664048	17	44278742	0.840349
		rs62054806	17	43915312	0.839922
		rs12150332	17	43824908	0.839494
		rs74464991	17	43821685	0.839066
		rs9303525	17	44187257	0.838638
		rs12150162	17	44114218	0.838209
		rs12185225	17	44113491	0.837781
		rs62054388	17	43805590	0.837353
		rs62054425	17	43819480	0.836924
		rs17563923	17	43819450	0.836496
		rs62060809	17	44148613	0.836067
		rs12150683	17	43824848	0.835638
		rs62059007	17	44005615	0.835208
		rs1052594	17	44102689	0.834779
		rs62062285	17	44095661	0.834349
		rs62060850	17	44157982	0.833919
		rs36076725	17	44110532	0.833487
		rs62061810	17	44178884	0.833055
		rs79959255	17	44077708	0.832624
		rs62054438	17	43825711	0.832191
		rs4608377	17	44113359	0.831759
		rs17574796	17	44115074	0.831327
		rs75500942	17	43816106	0.830895
		rs17660251	17	44166646	0.830463
		rs62062275	17	44093496	0.83003
		rs62054439	17	43825725	0.829598
		rs17690326	17	43920974	0.829165
		rs62054435	17	43825339	0.828733
		rs4327091	17	44021717	0.8283
		rs17574425	17	44109188	0.827867
		rs62064668	17	44082981	0.827435
		rs17576954	17	44181933	0.827002
		rs76761511	17	44185245	0.826569
		rs56150806	17	43919301	0.826136
		rs974292	17	44150464	0.825703
		rs2158257	17	44104343	0.825269
		rs62054815	17	43923266	0.824835
		rs1052590	17	44102638	0.824401
		rs62061764	17	44166197	0.823967
		rs111497072	17	43824201	0.823533
		rs17573858	17	44090796	0.823098
		rs112364920	17	44161360	0.822663
		rs62062284	17	44095570	0.822228
		rs62062289	17	44097235	0.821793
		rs1107820	17	44135359	0.821358
		rs75534191	17	44091724	0.820922
		rs4306559	17	44090236	0.820486
		rs75666751	17	44090148	0.820051
		rs62062265	17	44090035	0.819615
		rs10445333	17	43916509	0.819179
		rs75257002	17	43843395	0.818743
		rs62063682	17	44131622	0.818307
		rs62063680	17	44131559	0.81787
		rs35833914	17	44110541	0.817434
		rs62061714	17	44010452	0.816998
		rs17574604	17	44111613	0.816561
		rs56023973	17	43917776	0.816124
		rs62060760	17	44132887	0.815686
		rs62055546	17	43964567	0.815249
		rs747152	17	44090339	0.814811
		rs17576989	17	44183616	0.814373
		rs12150447	17	44128125	0.813935
		rs62062813	17	44032956	0.813497
		rs62054814	17	43921572	0.813059
		rs62063683	17	44131717	0.812621
		rs12149995	17	44092801	0.812182
		rs112074397	17	44131022	0.811743
		rs62063677	17	44129885	0.811303
		rs17653836	17	44128876	0.810864
		rs79649865	17	44130587	0.810424
		rs12150542	17	44115730	0.809985
		rs10514897	17	44117397	0.809545
		rs62062802	17	44028045	0.809105
		rs62064674	17	44088772	0.808665
		rs12185235	17	43923703	0.808225
		rs74977736	17	44126977	0.807784
		rs62063684	17	44132269	0.807343
		rs75715199	17	43825478	0.806902
		rs78328427	17	43916932	0.806459
		rs41280116	17	43902842	0.806017
		rs77692262	17	43917086	0.805575
		rs12150611	17	44149741	0.805132
		rs62062794	17	44026394	0.804689
		rs74922289	17	43918524	0.804246
		rs17763515	17	43917818	0.803802
		rs62062779	17	44022577	0.803358
		rs62062795	17	44027090	0.802915
		rs62062797	17	44027366	0.802471
		rs62062798	17	44027383	0.802027
		rs112583797	17	43918418	0.801583
		rs62062772	17	44020314	0.801139
		rs56082319	17	43844798	0.800694
		rs12150064	17	44128407	0.80025
		rs17573593	17	44082603	0.799805
		rs55709241	17	44041101	0.79936
		rs55831516	17	44148267	0.798915
		rs75643244	17	43823326	0.798469
		rs55996632	17	43935888	0.798023
		rs62062276	17	44093627	0.797577
		rs55933304	17	43992305	0.797131
		rs62055942	17	43850966	0.796684
		rs62063282	17	44039043	0.796236
		rs74850776	17	44150042	0.795789
		rs17575423	17	44129253	0.795342
		rs12373124	17	43924219	0.794894
		rs62060787	17	44136803	0.794446
		rs55714296	17	44137189	0.793998
		rs62060786	17	44136763	0.79355
		rs17653998	17	44135985	0.793103
		rs62064671	17	44086100	0.792654
		rs62060765	17	44133648	0.792205
		rs62060764	17	44133633	0.791756
		rs111259120	17	44133534	0.791307
		rs17576709	17	44173356	0.790858
		rs62063280	17	44037299	0.790409
		rs56365901	17	43960323	0.78996
		rs2316953	17	44140341	0.78951
		rs62060761	17	44133162	0.78906
		rs62062799	17	44027521	0.78861
		rs62054440	17	43827391	0.78816
		rs62060840	17	44153258	0.787709
		rs62063294	17	44044157	0.787259
		rs75229280	17	44196653	0.786808
		rs62064670	17	44085852	0.786357
		rs62063277	17	44036462	0.785905
		rs2188888	17	43953695	0.785453
		rs3919455	17	43953707	0.785001
		rs2214258	17	43953719	0.784549
		rs62063774	17	44050463	0.784097
		rs17652961	17	44108355	0.783645
		rs17653889	17	44133070	0.783193
		rs9891103	17	44091886	0.782741
		rs733966	17	44089563	0.782288
		rs56299858	17	43939659	0.781835
		rs4074462	17	43855228	0.781381
		rs17763596	17	43921210	0.780927
		rs77513497	17	44045474	0.780473
		rs2316771	17	43945931	0.780019
		rs79348289	17	44172698	0.779565
		rs79180862	17	44131798	0.77911
		rs12150230	17	44015464	0.778656
		rs17576631	17	44170018	0.7782
		rs876944	17	44134391	0.777745
		rs78962882	17	44084844	0.777288
		rs62063856	17	44076466	0.776832
		rs74829364	17	44084533	0.776375
		rs79857651	17	44013475	0.775918
		rs62064664	17	44081462	0.775461
		rs77924366	17	44182181	0.775004
		rs17650973	17	44044220	0.774546
		rs1078269	17	44075837	0.774088
		rs62060785	17	44136634	0.773629
		rs62061809	17	44178839	0.773171
		rs62061812	17	44180997	0.772712
		rs111952388	17	44181454	0.772253
		rs62061814	17	44181508	0.771794
		rs17334797	17	43825912	0.771336
		rs62055893	17	43842494	0.770877
		rs17575507	17	44134095	0.770417
		rs56369036	17	43841571	0.769957
		rs62063295	17	44044431	0.769497
		rs62063296	17	44046202	0.769037
		rs62062134	17	44114432	0.768576
		rs74373419	17	44047609	0.768115
		rs75145092	17	44044823	0.767654
		rs10445364	17	43916356	0.767192
		rs17651093	17	44049550	0.76673
		rs56180212	17	43960911	0.766267
		rs62060767	17	44134910	0.765805
		rs17650991	17	44044508	0.765342
		rs62063281	17	44038785	0.76488
		rs17563683	17	43811072	0.764417
		rs12185268	17	43923683	0.763953
		rs17574040	17	44102865	0.763488
		rs1052587	17	44102604	0.763022
		rs34043286	17	44117119	0.762556
		rs62062268	17	44090858	0.76209
		rs79589869	17	43930238	0.761622
		rs17763634	17	43921754	0.761155
		rs62061824	17	44188755	0.760687
		rs7350928	17	44108100	0.760219
		rs62062267	17	44090854	0.75975
		rs112415880	17	44042868	0.759281
		rs62061817	17	44182706	0.758813
		rs62063292	17	44043636	0.758343
		rs17572147	17	44044985	0.757873
		rs62063293	17	44043819	0.757403
		rs62063297	17	44047802	0.756933
		rs78077519	17	44010984	0.756464
		rs111676341	17	44183403	0.755994
		rs62063207	17	44211902	0.755523
		rs62062793	17	44026321	0.755052
		rs17690679	17	43924803	0.75458
		rs17577024	17	44186252	0.754108
		rs62062781	17	44022632	0.753635
		rs62062801	17	44028011	0.753161
		rs74903707	17	44028707	0.752687
		rs17650771	17	44035367	0.752213
		rs34283254	17	43902861	0.751736
		rs12373123	17	43924073	0.751259
		rs62062785	17	44024562	0.750781
		rs62062773	17	44020545	0.750303
		rs17651285	17	44054237	0.749825
		rs62062771	17	44020282	0.749346
		rs62062787	17	44024865	0.748868
		rs62062788	17	44024906	0.748389
		rs16940799	17	44102933	0.74791
		rs62062792	17	44025347	0.747431
		rs78026984	17	44025592	0.746952
		rs113395365	17	44025650	0.746472
		rs17574361	17	44108202	0.745993
		rs56354807	17	43920378	0.745514
		rs55718212	17	43920411	0.745033
		rs11079725	17	43923934	0.744552
		rs17577877	17	44208218	0.74407
		rs2732708	17	44351387	0.743587
		rs56166491	17	44042221	0.743105
		rs113756354	17	44013483	0.742621
		rs35631660	17	43832337	0.742137
		rs62056790	17	43975417	0.741652
		rs62056789	17	43975415	0.741167
		rs62073157	17	44334052	0.740682
		rs17572467	17	44054388	0.740197
		rs2217394	17	44053448	0.739711
		rs55943825	17	43924776	0.739225
		rs62063778	17	44053989	0.738739
		rs62054825	17	43930033	0.738253
		rs62062800	17	44027753	0.737766
		rs8712	17	44101871	0.737279
		rs80120913	17	44177755	0.736792
		rs17651134	17	44050340	0.736304
		rs79065019	17	44124535	0.735816
		rs56971664	17	43918613	0.735328
		rs56108300	17	44077851	0.73484
		rs2163129	17	44056433	0.734351
		rs62063775	17	44050823	0.733862
		rs55900347	17	44176092	0.733373
		rs55719714	17	43939638	0.732884
		rs62061795	17	44173179	0.732395
		rs17572248	17	44049867	0.731905
		rs111372048	17	44136577	0.731415
		rs12150229	17	44015446	0.730925
		rs62063779	17	44054671	0.730435
		rs2163130	17	44056434	0.729943
		rs62064665	17	44081527	0.729451
		rs62063777	17	44053171	0.728959
		rs62063855	17	44075535	0.728465
		rs17563599	17	43807955	0.727972
		rs17572495	17	44054596	0.727479
		rs62061821	17	44186055	0.726985
		rs79301522	17	44207932	0.726491
		rs62061815	17	44181681	0.725997
		rs62054393	17	43809264	0.725502
		rs111724389	17	44209364	0.725008
		rs62056792	17	43976644	0.724513
		rs56226437	17	44042361	0.724017
		rs17577052	17	44186301	0.723522
		rs17426064	17	43828698	0.723026
		rs62063306	17	44050395	0.72253
		rs62063291	17	44043378	0.722034
		rs77635460	17	44186593	0.721538
		rs12948216	17	43836673	0.721041
		rs17577159	17	44188477	0.720544
		rs77290642	17	44068480	0.720047
		rs4383188	17	44197603	0.719549
		rs62061816	17	44182336	0.719052
		rs17651243	17	44052284	0.718554
		rs62054387	17	43805525	0.718057
		rs2316773	17	43946536	0.717559
		rs55707339	17	43842462	0.71706
		rs62061818	17	44182917	0.716561
		rs1876829	17	43911443	0.716062
		rs55907036	17	44042366	0.715561
		rs62063303	17	44049133	0.71506
		rs62061822	17	44186894	0.714559
		rs17661385	17	44207778	0.714057
		rs75839508	17	44022319	0.713554
		rs62063304	17	44049900	0.71305
		rs10445336	17	43934948	0.712546
		rs62055486	17	43949092	0.712042
		rs1800547	17	44051846	0.711537
		rs62063305	17	44050282	0.711031
		rs62062774	17	44021463	0.710526
		rs62054824	17	43929992	0.710019
		rs75242405	17	44049329	0.709511
		rs62055488	17	43950394	0.709003
		rs62062783	17	44023520	0.708495
		rs17691449	17	43964283	0.707986
		rs62063776	17	44050850	0.707476
		rs17689882	17	43906828	0.706965
		rs62062782	17	44023087	0.706454
		rs17650842	17	44037491	0.705942
		rs62057103	17	43887480	0.70543
		rs62062777	17	44022068	0.704918
		rs111327992	17	44126691	0.704405
		rs12185233	17	43923654	0.703892
		rs17660936	17	44191159	0.703378
		rs75686108	17	44022376	0.702863
		rs16940806	17	44103826	0.702348
		rs4371195	17	43986420	0.701833
		rs16940668	17	43907966	0.701318
		rs62062796	17	44027316	0.700802
		rs62062776	17	44022043	0.700287
		rs113871181	17	43852733	0.699771
		rs75010486	17	44103825	0.699254
		rs55763795	17	43908773	0.698737
		rs2082068	17	43979971	0.698218
		rs62061707	17	44006954	0.6977
		rs79346219	17	44184375	0.697181
		rs17571809	17	44034859	0.69666
		rs12373139	17	43924130	0.696139
		rs55711941	17	44040823	0.695617
		rs17650818	17	44036787	0.695094
		rs111324579	17	44082181	0.694571
		rs62063780	17	44056238	0.694047
		rs77604208	17	44177669	0.693522
		rs113857334	17	44044940	0.692996
		rs16940665	17	43907896	0.69247
		rs56249080	17	43939432	0.691943
		rs56227067	17	43939609	0.691415
		rs75412750	17	44172773	0.690887
		rs62061708	17	44006956	0.69036
		rs1876830	17	43911352	0.689831
		rs55865707	17	43908826	0.689302
		rs62063203	17	44209313	0.688772
		rs62063163	17	44201865	0.688242
		rs112401617	17	44209474	0.687712
		rs113434679	17	44126765	0.687181
		rs169201	17	44790203	0.68665
		rs62063164	17	44201887	0.686117
		rs55726761	17	44099669	0.685582
		rs62056800	17	43979468	0.685048
		rs76618565	17	44068481	0.684512
		rs62057111	17	43897130	0.683976
		rs55937610	17	43960283	0.68344
		rs62056801	17	43979504	0.682904
		rs16940674	17	43910507	0.682369
		rs55788678	17	43992233	0.681832
		rs17564871	17	44011018	0.681294
		rs17650860	17	44039008	0.680757
		rs56280951	17	44041107	0.680218
		rs62056779	17	43971937	0.679678
		rs16940681	17	43912159	0.679138
		rs62061850	17	44194519	0.678597
		rs1876828	17	43911525	0.678057
		rs1876827	17	43911832	0.677516
		rs79923708	17	44183790	0.676975
		rs8080583	17	44162597	0.676433
		rs12150087	17	44210988	0.675891
		rs41457044	17	43911424	0.675349
		rs17577975	17	44210442	0.674805
		rs62055936	17	43848761	0.674262
		rs10445369	17	43934776	0.673718
		rs10445334	17	43934826	0.673174
		rs55673340	17	43948733	0.67263
		rs10445335	17	43934896	0.672086
		rs62055558	17	43966955	0.671542
		rs10514901	17	44194735	0.670998
		rs77092481	17	43949008	0.670453
		rs12150170	17	44090646	0.669909
		rs12150515	17	44090685	0.669364
		rs62062266	17	44090704	0.66882
		rs28364021	17	43912282	0.668275
		rs62063271	17	44036047	0.66773
		rs2106784	17	43949892	0.667184
		rs2316769	17	43930798	0.666638
		rs2158072	17	43950195	0.666091
		rs1981998	17	44056833	0.665543
		rs78555354	17	44032879	0.664995
		rs56327054	17	43943957	0.664447
		rs79115768	17	44021061	0.663897
		rs10514903	17	44206646	0.663348
		rs17577313	17	44191835	0.662796
		rs1981997	17	44056767	0.662243
		rs17661045	17	44194152	0.661689
		rs17661141	17	44196015	0.661134
		rs56036719	17	43943974	0.660578
		rs17650901	17	44039691	0.660022
		rs17660847	17	44189373	0.659465
		rs111370985	17	43852742	0.658908
		rs17690661	17	43924521	0.658351
		rs55780945	17	44040120	0.657793
		rs16940676	17	43911036	0.657235
		rs112206871	17	44041817	0.656677
		rs1966345	17	44197806	0.656118
		rs10445370	17	43935118	0.655558
		rs62055495	17	43953043	0.654998
		rs62055493	17	43952944	0.654436
		rs17577954	17	44209628	0.653873
		rs112572874	17	44072984	0.65331
		rs62062286	17	44096486	0.652747
		rs62055525	17	43958736	0.652183
		rs112915466	17	43958744	0.651619
		rs62055544	17	43964539	0.651054
		rs1560310	17	43978534	0.650489
		rs55946323	17	44031946	0.649924
		rs56301633	17	44077850	0.649358
		rs62061852	17	44195424	0.648791
		rs62063262	17	44033002	0.648223
		rs56317731	17	44032073	0.647655
		rs62063269	17	44034833	0.647087
		rs62061854	17	44198080	0.646518
		rs62061851	17	44194891	0.645949
		rs17577496	17	44194835	0.645379
		rs11079717	17	43835351	0.644808
		rs17577447	17	44194381	0.644238
		rs62054763	17	43910262	0.643667
		rs1378358	17	44787312	0.643097
		rs111678697	17	44197032	0.642525
		rs62055529	17	43960020	0.641952
		rs55909047	17	44209957	0.64138
		rs62055516	17	43956390	0.640807
		rs62055517	17	43956425	0.640234
		rs62054380	17	43800987	0.639661
		rs4401083	17	43806015	0.639088
		rs112333322	17	44126673	0.638514
		rs1122380	17	44206079	0.637939
		rs74548327	17	43973080	0.637363
		rs62057101	17	43885291	0.636787
		rs12150048	17	43827471	0.63621
		rs55801356	17	43837237	0.635632
		rs17770296	17	43969136	0.635054
		rs77426526	17	43962982	0.634476
		rs80346216	17	43974476	0.633896
		rs41382552	17	44118999	0.633315
		rs55978005	17	44031540	0.632733
		rs17650872	17	44039516	0.632151
		rs62055878	17	43835854	0.631569
		rs739642	17	43946838	0.630987
		rs757055	17	43946875	0.630405
		rs62055471	17	43943755	0.629822
		rs62056774	17	43969901	0.629239
		rs62055541	17	43962017	0.628656
		rs55895732	17	43968937	0.628072
		rs17661027	17	44193097	0.627488
		rs55943606	17	43968874	0.626904
		rs112425426	17	43963416	0.626319
		rs62056786	17	43975285	0.625735
		rs62056780	17	43973652	0.625149
		rs2019816	17	43959661	0.624564
		rs56249780	17	43957328	0.623979
		rs55894109	17	43957221	0.623394
		rs56101773	17	43957269	0.622808
		rs111880194	17	44194621	0.622223
		rs113327263	17	43965063	0.621638
		rs62055553	17	43966178	0.621052
		rs62055552	17	43965955	0.620466
		rs7350980	17	44110271	0.619881
		rs62055498	17	43953814	0.619294
		rs62055556	17	43966749	0.618708
		rs62055557	17	43966795	0.618121
		rs12150576	17	44015624	0.617534
		rs62055483	17	43948040	0.616947
		rs17691466	17	43968219	0.61636
		rs7221390	17	44116950	0.615773
		rs17564829	17	44006601	0.615185
		rs80348388	17	43952634	0.614597
		rs62061721	17	44013346	0.614008
		rs113537106	17	44016462	0.613418
		rs62061725	17	44016157	0.612828
		rs12150242	17	44015816	0.612238
		rs17661348	17	44207066	0.611647
		rs4255816	17	44010364	0.611055
		rs4597358	17	44110670	0.610463
		rs10514904	17	44207887	0.60987
		rs2873268	17	43930955	0.609277
		rs17652502	17	44094471	0.608683
		rs17689918	17	43910088	0.608088
		rs78587102	17	43897246	0.60749
		rs10445338	17	44067682	0.606893
		rs17650258	17	44011073	0.606296
		rs17763086	17	43905481	0.605698
		rs12150125	17	43986432	0.605099
		rs62057158	17	43907143	0.604501
		rs62061859	17	44201109	0.603902
		rs35879086	17	43830382	0.603302
		rs17573607	17	44083081	0.602702
		rs2668632	17	44319366	0.602102
		rs75652502	17	44200510	0.601501
		rs112560196	17	44200078	0.600898
		rs62054437	17	43825576	0.600296
		rs1876831	17	43907745	0.599694
		rs4441322	17	43955030	0.599091
		rs17660228	17	44166500	0.598489
		rs17689378	17	43881790	0.597886
		rs62055540	17	43961142	0.597283
		rs112454267	17	44005329	0.59668
		rs62055539	17	43961044	0.596076
		rs8070942	17	44208674	0.595472
		rs17563800	17	43817459	0.594867
		rs62055494	17	43953016	0.59426
		rs62054843	17	43937184	0.593654
		rs1122381	17	44205839	0.593047
		rs113909426	17	44196822	0.59244
		rs112813897	17	44196799	0.591833
		rs62055470	17	43943657	0.591226
		rs62055559	17	43967138	0.590618
		rs62055502	17	43954284	0.59001
		rs62055469	17	43943655	0.589401
		rs79193046	17	43967562	0.588792
		rs62055875	17	43832864	0.588183
		rs62055869	17	43830685	0.587573
		rs17426174	17	43830938	0.586963
		rs62055871	17	43831112	0.586352
		rs17770150	17	43964163	0.585741
		rs62054842	17	43937162	0.585129
		rs62054841	17	43937104	0.584516
		rs79889833	17	43937633	0.583902
		rs76329216	17	43938499	0.583289
		rs56347602	17	43939255	0.582675
		rs62054858	17	43940188	0.582061
		rs34211253	17	43834074	0.581447
		rs17763199	17	43910183	0.580832
		rs62054859	17	43940685	0.580218
		rs62055460	17	43940825	0.579603
		rs62055462	17	43941476	0.578989
		rs77652965	17	43941608	0.578374
		rs62055467	17	43942820	0.57776
		rs62061730	17	44017342	0.577145
		rs62055468	17	43943000	0.57653
		rs12150223	17	43944204	0.575914
		rs76839282	17	44029178	0.575299
		rs34008514	17	43834314	0.574684
		rs55821155	17	44032470	0.574068
		rs62055542	17	43963844	0.573451
		rs78637438	17	43945855	0.572835
		rs17650579	17	44030115	0.572219
		rs62064669	17	44084676	0.571603
		rs17691556	17	43969168	0.570987
		rs62061728	17	44017180	0.57037
		rs55780786	17	44209875	0.569753
		rs3089	17	44209919	0.569135
		rs17563433	17	43800351	0.568518
		rs62055549	17	43965595	0.5679
		rs62055499	17	43953991	0.567282
		rs1864324	17	43977702	0.566664
		rs17660132	17	44165803	0.566045
		rs76627340	17	43937460	0.565426
		rs112746008	17	44126650	0.564806
		rs113414067	17	43955093	0.564187
		rs113638513	17	44204749	0.563568
		rs62062806	17	44031420	0.562948
		rs77129180	17	43963046	0.562328
		rs36047693	17	43833824	0.561708
		rs62055500	17	43954134	0.561088
		rs17660065	17	44162284	0.560468
		rs9915547	17	44212782	0.559847
		rs62055548	17	43964899	0.559227
		rs4548919	17	44192395	0.558606
		rs56042957	17	43992244	0.557985
		rs1560311	17	43978625	0.557363
		rs74514268	17	43836191	0.556742
		rs2902662	17	43806925	0.55612
		rs62055501	17	43954227	0.555498
		rs56013908	17	43836920	0.554876
		rs62061823	17	44188645	0.554253
		rs74496580	17	43974065	0.55363
		rs55905252	17	43955365	0.553007
		rs55747440	17	43837115	0.552385
		rs62061727	17	44017124	0.551762
		rs17770108	17	43961292	0.551139
		rs34579278	17	43833981	0.550515
		rs56168907	17	43837091	0.549892
		rs62055868	17	43830640	0.549268
		rs62055883	17	43837446	0.548644
		rs62056785	17	43975263	0.54802
		rs113834264	17	43979622	0.547395
		rs62056760	17	43968572	0.546771
		rs79882507	17	43837782	0.546146
		rs2316774	17	43946642	0.545522
		rs62056802	17	43980762	0.544897
		rs17691508	17	43968463	0.544272
		rs62055554	17	43966260	0.543646
		rs62061729	17	44017283	0.543021
		rs3087534	17	44198806	0.542395
		rs55810795	17	43992283	0.54177
		rs62056794	17	43977049	0.541144
		rs17575683	17	44139662	0.540518
		rs34416056	17	43951220	0.539891
		rs56387391	17	43959261	0.539264
		rs78729125	17	43970108	0.538637
		rs17770120	17	43963943	0.538009
		rs62056776	17	43969995	0.537382
		rs62056775	17	43969952	0.536753
		rs74863825	17	43963120	0.536124
		rs76594404	17	43971457	0.535496
		rs80233201	17	43971481	0.534866
		rs74457229	17	43972581	0.534237
		rs62056778	17	43971604	0.533608
		rs11575896	17	43972142	0.532979
		rs62056773	17	43969833	0.53235
		rs55877243	17	43969019	0.53172
		rs62056761	17	43969686	0.531091
		rs55960528	17	43968994	0.530461
		rs62054834	17	43934314	0.529831
		rs56194412	17	43960600	0.529201
		rs2006305	17	43959752	0.528571
		rs34097347	17	43949448	0.527941
		rs78238042	17	43948159	0.527311
		rs62055538	17	43960997	0.526681
		rs62056781	17	43973899	0.52605
		rs80254317	17	43963282	0.525418
		rs62063796	17	44068289	0.524787
		rs62063797	17	44068294	0.524155
		rs55975673	17	43959113	0.523524
		rs56343551	17	43959092	0.522892
		rs55653657	17	43956778	0.522261
		rs62055518	17	43956505	0.521629
		rs56364632	17	43956642	0.520998
		rs76563578	17	43933879	0.520366
		rs12150235	17	44015745	0.519735
		rs754513	17	44055638	0.519103
		rs111962225	17	43934016	0.518471
		rs62056783	17	43974549	0.517838
		rs62063200	17	44206482	0.517205
		rs2316782	17	44010040	0.516572
		rs62055497	17	43953529	0.515938
		rs17651213	17	44051924	0.515303
		rs2316948	17	44094667	0.514669
		rs77370070	17	43800404	0.514034
		rs62063681	17	44131592	0.513398
		rs56289364	17	43947928	0.512762
		rs12150195	17	44014263	0.512126
		rs12150460	17	44014137	0.51149
		rs17564703	17	44002595	0.510854
		rs4581739	17	44204739	0.510218
		rs2055795	17	43951995	0.509581
		rs62059005	17	44004472	0.508944
		rs2055796	17	43952191	0.508307
		rs2696609	17	44293205	0.507669
		rs56273589	17	44203131	0.507031
		rs62057112	17	43897202	0.506393
		rs11079729	17	44115569	0.505754
		rs754512	17	44055647	0.505115
		rs62056791	17	43976064	0.504476
		rs62055937	17	43848968	0.503836
		rs878886	17	43912490	0.503196
		rs77924424	17	44012915	0.502556
		rs17575556	17	44135827	0.501914
		rs17652449	17	44088937	0.501272
		rs62055876	17	43832940	0.500629
		rs2316765	17	43912454	0.499986
		rs55874169	17	44014384	0.499343
		rs63750417	17	44060775	0.4987
		rs77625338	17	43937671	0.498055
		rs62062790	17	44025045	0.497409
		rs62054857	17	43939936	0.496763
		rs62063798	17	44068543	0.496115
		rs12150104	17	44015929	0.495467
		rs62055491	17	43951120	0.49482
		rs62054846	17	43938634	0.494172
		rs56214516	17	43836953	0.493523
		rs112385572	17	44066172	0.492875
		rs113134013	17	44066995	0.492226
		rs17577650	17	44205500	0.491577
		rs62062789	17	44025033	0.490928
		rs62063202	17	44208945	0.490278
		rs12943085	17	43834482	0.489627
		rs10445371	17	44065410	0.488976
		rs62063794	17	44066088	0.488324
		rs17426106	17	43828935	0.487672
		rs55673092	17	43938882	0.48702
		rs17770186	17	43964191	0.486368
		rs17651700	17	44066634	0.485715
		rs62054844	17	43937333	0.485062
		rs17650633	17	44030231	0.484408
		rs62055475	17	43945106	0.483753
		rs739643	17	43946707	0.483098
		rs55929431	17	44000202	0.482443
		rs55876817	17	43958139	0.481787
		rs62055464	17	43941858	0.481131
		rs56257094	17	44201667	0.480475
		rs55672516	17	44201680	0.479818
		rs62056784	17	43974889	0.479161
		rs1467962	17	43978604	0.478504
		rs76357066	17	44067046	0.477847
		rs17563787	17	43813252	0.477189
		rs35282504	17	43832618	0.476531
		rs12150672	17	43826637	0.475872
		rs75690239	17	43941710	0.475213
		rs62063795	17	44068238	0.474554
		rs62055463	17	43941491	0.473895
		rs62061853	17	44196125	0.473236
		rs62055465	17	43942046	0.472576
		rs62063174	17	44205122	0.471917
		rs17425752	17	43906726	0.471257
		rs55888391	17	43938107	0.470596
		rs56099546	17	43894609	0.469935
		rs34195569	17	43833921	0.469274
		rs62061732	17	44017941	0.468612
		rs62055466	17	43942656	0.467951
		rs1078830	17	43946112	0.467289
		rs1467963	17	43978934	0.466626
		rs12150516	17	43944519	0.465963
		rs77489223	17	43937736	0.4653
		rs55823844	17	43978320	0.464636
		rs17650651	17	44030311	0.463973
		rs55781174	17	43944158	0.463309
		rs727425	17	44195495	0.462645
		rs78929339	17	44189910	0.461981
		rs77017444	17	44028796	0.461317
		rs55645418	17	43832115	0.460652
		rs76667867	17	43799810	0.459986
		rs62054378	17	43799667	0.45932
		rs62056795	17	43978041	0.458654
		rs56280222	17	43803788	0.457988
		rs55885063	17	44202952	0.45732
		rs55686102	17	44202608	0.456653
		rs62057149	17	43903546	0.455985
		rs55802590	17	44201344	0.455318
		rs55768605	17	43956734	0.454649
		rs56380663	17	43804619	0.453981
		rs2019822	17	43959918	0.453312
		rs878887	17	43912582	0.452642
		rs62061847	17	44191682	0.451972
		rs79580365	17	43960172	0.451302
		rs78599197	17	44069970	0.450632
		rs62055461	17	43941350	0.449962
		rs77095128	17	44204304	0.449292
		rs55691306	17	43978295	0.448621
		rs62056796	17	43978120	0.44795
		rs41437445	17	44116238	0.44728
		rs4479289	17	43793951	0.446609
		rs62055547	17	43964755	0.445937
		rs62055496	17	43953307	0.445265
		rs17660865	17	44189408	0.444593
		rs17563827	17	43818222	0.443921
		rs77926909	17	43994252	0.443249
		rs62061731	17	44017666	0.442575
		rs17650597	17	44030195	0.4419
		rs1984937	17	43980530	0.441225
		rs2532363	17	44333423	0.440551
		rs62061706	17	44006896	0.439875
		rs55646970	17	43938796	0.4392
		rs17770343	17	43970154	0.438525
		rs76632685	17	43974477	0.437849
		rs62056777	17	43970303	0.437172
		rs78720789	17	43973413	0.436494
		rs62055478	17	43945938	0.435817
		rs62055884	17	43837567	0.435139
		rs62062294	17	44100666	0.43446
		rs2055794	17	43951717	0.43378
		rs17649918	17	44001621	0.433099
		rs56002706	17	44000505	0.432418
		rs17649019	17	43801593	0.431737
		rs112570965	17	43801092	0.431056
		rs111941646	17	43966608	0.430374
		rs62054835	17	43934672	0.429691
		rs919461	17	44065669	0.429008
		rs17691610	17	43970662	0.428324
		rs56357543	17	43894547	0.427638
		rs17571718	17	44032768	0.426952
		rs55685451	17	44001957	0.426266
		rs55788597	17	44003397	0.425579
		rs56197117	17	44003446	0.424892
		rs17689471	17	43892973	0.424204
		rs1052553	17	44073889	0.423517
		rs56249311	17	44003599	0.42283
		rs62059004	17	44003893	0.422142
		rs62061712	17	44009876	0.421455
		rs62058968	17	44001228	0.420767
		rs17653162	17	44111827	0.420078
		rs111520035	17	44039410	0.41939
		rs62061715	17	44011526	0.418702
		rs62061719	17	44012989	0.418013
		rs17571739	17	44032915	0.417325
		rs55692232	17	44164323	0.416636
		rs75743061	17	44068112	0.415947
		rs62057147	17	43903298	0.415257
		rs8078495	17	44000610	0.414568
		rs1880750	17	43796541	0.413878
		rs62054383	17	43802907	0.413186
		rs62057157	17	43905313	0.412494
		rs17575850	17	44144387	0.4118
		rs4482334	17	43912830	0.411105
		rs17769490	17	43925605	0.410411
		rs17770337	17	43969779	0.409715
		rs17651754	17	44067546	0.409018
		rs111652694	17	44067831	0.408322
		rs17652121	17	44073973	0.407625
		rs12150527	17	43986462	0.406928
		rs2099151	17	43979822	0.406231
		rs4525537	17	43912723	0.405531
		rs75945623	17	43937505	0.404831
		rs17651887	17	44069840	0.40413
		rs56233672	17	43920300	0.403429
		rs113796169	17	44005254	0.402726
		rs62054382	17	43802525	0.402023
		rs878888	17	43912635	0.401319
		rs56323722	17	43798015	0.400616
		rs55886302	17	43936011	0.399911
		rs74759276	17	44069768	0.399206
		rs17651857	17	44069687	0.398502
		rs79406732	17	43940497	0.397796
		rs16940677	17	43911898	0.39709
		rs113120855	17	44203520	0.396383
		rs17763533	17	43918190	0.395673
		rs1468241	17	44196153	0.394962
		rs17426195	17	43832367	0.394248
		rs62063172	17	44203366	0.393532
		rs62056793	17	43977018	0.392817
		rs56234850	17	44060248	0.392101
		rs62061849	17	44193882	0.391386
		rs62063165	17	44202147	0.390669
		rs79447161	17	44067508	0.389953
		rs17661428	17	44208144	0.389236
		rs77819001	17	43799804	0.388518
		rs75403953	17	43798546	0.387799
		rs55989971	17	43798160	0.387081
		rs17564983	17	44011825	0.386363
		rs76324150	17	43973233	0.385645
		rs113347741	17	43973408	0.384926
		rs62059008	17	44006085	0.384207
		rs55669501	17	44202564	0.383488
		rs62063166	17	44202231	0.382768
		rs62056782	17	43974230	0.382048
		rs56301449	17	43960918	0.381327
		rs79772576	17	44106220	0.380606
		rs112995313	17	43795768	0.379884
		rs10514879	17	43802971	0.379161
		rs111415173	17	43795573	0.378438
		rs62063786	17	44061023	0.377714
		rs17574824	17	44115107	0.376991
		rs62062805	17	44030773	0.376267
		rs56205560	17	43804389	0.375543
		rs62054436	17	43825568	0.374818
		rs919464	17	44065901	0.374094
		rs76500077	17	44004076	0.373368
		rs8079501	17	44000234	0.37264
		rs55962674	17	43799033	0.371911
		rs55653963	17	43799509	0.371182
		rs62063854	17	44074619	0.370453
		rs62063853	17	44074613	0.369724
		rs4566212	17	43895751	0.368994
		rs76090253	17	44002969	0.368264
		rs111972148	17	43973121	0.367533
		rs4335809	17	43902216	0.366802
		rs76669427	17	43836051	0.366069
		rs56323304	17	43932129	0.365336
		rs17564591	17	44002062	0.364602
		rs62059003	17	44002431	0.363868
		rs17650417	17	44013103	0.363135
		rs55944735	17	43958172	0.362401
		rs56398500	17	43947488	0.361665
		rs62061709	17	44007493	0.360929
		rs12150090	17	44115886	0.360192
		rs78104015	17	44052733	0.359453
		rs62057107	17	43896032	0.358714
		rs62061716	17	44012096	0.357973
		rs7501759	17	44009921	0.357232
		rs113952577	17	44010661	0.356489
		rs4640231	17	43912786	0.355746
		rs62057148	17	43903485	0.355003
		rs62057156	17	43904948	0.354259
		rs62061713	17	44010405	0.353515
		rs62061726	17	44016341	0.35277
		rs17650335	17	44012343	0.352025
		rs2316783	17	44010118	0.35128
		rs62063845	17	44071294	0.350535
		rs4479288	17	43793828	0.34979
		rs1052551	17	44068924	0.349044
		rs1819040	17	44219831	0.348298
		rs62057150	17	43903548	0.347549
		rs1076222	17	44109769	0.346799
		rs62056810	17	43984672	0.346045
		rs62056809	17	43984669	0.34529
		rs62061720	17	44013189	0.344535
		rs17649866	17	44000914	0.343779
		rs62063800	17	44069198	0.343023
		rs62063842	17	44070111	0.342267
		rs62063784	17	44059775	0.34151
		rs62063846	17	44071674	0.340753
		rs55662347	17	44070545	0.339995
		rs2732711	17	44350293	0.339231
		rs17563986	17	43991272	0.338468
		rs739645	17	43894990	0.337703
		rs76380490	17	44203413	0.336938
		rs56254732	17	43932049	0.336168
		rs113991678	17	43795634	0.335399
		rs62063851	17	44074435	0.334627
		rs28364025	17	43894102	0.333855
		rs76007856	17	43795238	0.333083
		rs75310534	17	43794286	0.332309
		rs17651483	17	44058861	0.331535
		rs62054384	17	43804306	0.330762
		rs17649635	17	43995990	0.329981
		rs17651549	17	44061278	0.329198
		rs62056841	17	43990041	0.32841
		rs78209533	17	43989909	0.327623
		rs112116311	17	43989898	0.326835
		rs62056840	17	43989689	0.326046
		rs7350923	17	43834970	0.325258
		rs79860128	17	43990072	0.324468
		rs62056837	17	43988884	0.323679
		rs17572169	17	44045974	0.322889
		rs112275277	17	43981958	0.322098
		rs17762769	17	43893403	0.321306
		rs17572627	17	44058629	0.320514
		rs739644	17	43895008	0.31972
		rs4309444	17	43895797	0.318922
		rs55779147	17	43894510	0.318122
		rs12150390	17	43896228	0.317323
		rs17659881	17	44157597	0.316521
		rs28364023	17	43894159	0.315719
		rs17573245	17	44072854	0.314917
		rs62063787	17	44061036	0.314114
		rs62063849	17	44073062	0.313309
		rs62056835	17	43988623	0.312502
		rs17763050	17	43903336	0.311694
		rs62057146	17	43903106	0.310884
		rs74509629	17	43985597	0.310075
		rs78506181	17	43897480	0.309265
		rs1912151	17	43902944	0.308455
		rs62057152	17	43904110	0.307644
		rs62056808	17	43984646	0.306833
		rs62063799	17	44069180	0.306018
		rs3885074	17	43902738	0.305204
		rs62057155	17	43904673	0.304389
		rs62063850	17	44073739	0.303574
		rs62056839	17	43989221	0.302758
		rs17572613	17	44058004	0.301942
		rs62063783	17	44059215	0.301124
		rs112137135	17	43900817	0.300306
		rs55913645	17	44070956	0.299487
		rs55736025	17	44072017	0.298669
		rs55886080	17	44072041	0.29785
		rs62056838	17	43989087	0.297032
		rs1864325	17	43977827	0.296213
		rs62057154	17	43904610	0.295394
		rs17572361	17	44052009	0.294573
		rs77527347	17	44058017	0.293752
		rs17652066	17	44073145	0.292929
		rs17574228	17	44104509	0.292104
		rs17649571	17	43994952	0.291277
		rs1467968	17	43986396	0.290445
		rs17564020	17	43991781	0.289612
		rs78681971	17	44106219	0.288776
		rs17563965	17	43990919	0.28794
		rs62056811	17	43985247	0.287102
		rs56046792	17	43797246	0.286261
		rs62056851	17	43992806	0.285418
		rs7502888	17	43986992	0.284574
		rs62057109	17	43896637	0.283729
		rs17691328	17	43955487	0.282883
		rs75617973	17	43983159	0.282035
		rs73984689	17	44184404	0.281187
		rs75046472	17	43997499	0.280338
		rs41374248	17	44120442	0.279487
		rs62063208	17	44212032	0.278635
		rs55721252	17	43958099	0.277781
		rs17573266	17	44072881	0.276924
		rs17660907	17	44191085	0.276063
		rs62058965	17	43999529	0.275201
		rs1476127	17	43999793	0.274338
		rs62057108	17	43896616	0.27347
		rs41280118	17	43903089	0.272602
		rs62063171	17	44203311	0.271728
		rs767057	17	43998822	0.270854
		rs62063687	17	44132592	0.269978
		rs41384744	17	44137070	0.269101
		rs4609898	17	43794182	0.268219
		rs112073200	17	44201791	0.267337
		rs919462	17	44065740	0.266453
		rs111295615	17	44184428	0.265568
		rs1467970	17	43998574	0.264682
		rs17334894	17	43827209	0.263797
		rs62058962	17	43998151	0.262907
		rs74573628	17	43982961	0.262012
		rs62056946	17	43798401	0.261113
		rs17660595	17	44180954	0.260212
		rs1078268	17	44075901	0.259309
		rs767056	17	43998910	0.258404
		rs62056804	17	43982286	0.257493
		rs111447859	17	43987184	0.256582
		rs62056806	17	43983801	0.25567
		rs79290980	17	43985662	0.254756
		rs56167344	17	43797087	0.253843
		rs1467966	17	43984399	0.25293
		rs79492906	17	43984864	0.252014
		rs55760800	17	43996908	0.251097
		rs77084869	17	43982903	0.250181
		rs56303672	17	43996960	0.249263
		rs62056803	17	43982159	0.248343
		rs17689824	17	43904397	0.247423
		rs17564223	17	43997520	0.246502
		rs62056807	17	43984253	0.245579
		rs4341787	17	43902505	0.244655
		rs62055545	17	43964561	0.243728
		rs1967981	17	43999785	0.2428
		rs17762954	17	43899786	0.24187
		rs17564153	17	43995098	0.240941
		rs17577094	17	44187492	0.240005
		rs62057113	17	43897449	0.239069
		rs2668622	17	44352131	0.238124
		rs34579536	17	44108906	0.237178
		rs55682376	17	43991888	0.236228
		rs4523962	17	43902522	0.235277
		rs75944932	17	44072423	0.234323
		rs62056805	17	43983363	0.233369
		rs79600142	17	43897722	0.232412
		rs56146262	17	43931907	0.231449
		rs62056849	17	43992463	0.23048
		rs10445337	17	44067400	0.229507
		rs62057153	17	43904528	0.228532
		rs17573175	17	44071089	0.227557
		rs62056848	17	43992456	0.22658
		rs767058	17	43998767	0.225594
		rs55751924	17	43932155	0.224603
		rs62057118	17	43899727	0.223607
		rs62054833	17	43933673	0.222608
		rs2873269	17	43931122	0.221606
		rs56288604	17	43931380	0.2206
		rs62063852	17	44074581	0.219594
		rs62057110	17	43896734	0.218582
		rs2696532	17	44355602	0.217567
		rs17690987	17	43931626	0.216549
		rs78074121	17	43896690	0.215531
		rs79501144	17	43900697	0.214506
		rs17564619	17	44002138	0.213462
		rs55942528	17	43932028	0.212406
		rs28439143	17	43987723	0.211337
		rs112647192	17	43994623	0.210264
		rs62058964	17	43999406	0.209184
		rs12150111	17	44013938	0.208102
		rs17650063	17	44002555	0.207013
		rs4340365	17	43930980	0.20592
		rs17565025	17	44012463	0.204824
		rs17689608	17	43896528	0.203728
		rs62057119	17	43899736	0.202627
		rs17564780	17	44005413	0.201517
		rs113856644	17	43932277	0.2004
		rs62054831	17	43932381	0.199283
		rs62056859	17	43994435	0.198137
		rs17649518	17	43994386	0.19699
		rs111541901	17	43994358	0.195843
		rs2668662	17	44290759	0.194696
		rs2732601	17	44291479	0.193548
		rs17563501	17	43801695	0.1924
		rs62055888	17	43838720	0.191244
		rs17762882	17	43898887	0.190088
		rs17689653	17	43898963	0.188931
		rs55838058	17	43798902	0.187775
		rs56062621	17	43798903	0.186607
		rs79765413	17	44022433	0.185439
		rs62057143	17	43901528	0.184268
		rs916793	17	43954686	0.183093
		rs17650381	17	44013024	0.181903
		rs4564621	17	43895501	0.180709
		rs9944484	17	43990662	0.179514
		rs8073146	17	43893751	0.178318
		rs62057115	17	43899417	0.177121
		rs62057123	17	43901238	0.175922
		rs2732629	17	44289101	0.174716
		rs62057114	17	43899401	0.173507
		rs2668692	17	44293020	0.172279
		rs17564493	17	44001379	0.171049
		rs62056812	17	43987154	0.169815
		rs4566211	17	43895696	0.168573
		rs111739681	17	43898459	0.16733
		rs17762912	17	43899161	0.16608
		rs2316764	17	43895602	0.164829
		rs77807457	17	43810851	0.163562
		rs2696610	17	44291820	0.162287
		rs1396862	17	43902997	0.161011
		rs2532276	17	44246624	0.159716
		rs2004673	17	44075099	0.158402
		rs2004674	17	44075110	0.157083
		rs78917479	17	43899611	0.155745
		rs11079733	17	44269964	0.154403
		rs17649641	17	43997372	0.153055
		rs4277389	17	43895653	0.151704
		rs17564948	17	44011749	0.150331
		rs2696541	17	44351743	0.148956
		rs62057116	17	43899655	0.147575
		rs77804065	17	43810896	0.146185
		rs62056850	17	43992581	0.144749
		rs62057117	17	43899657	0.143312
		rs2532229	17	44277265	0.141875
		rs2696633	17	44270059	0.140427
		rs17649553	17	43994648	0.138969
		rs1467969	17	43998328	0.137501
		rs62057122	17	43901001	0.136031
		rs2532233	17	44273218	0.134552
		rs75210307	17	43940012	0.133062
		rs62060947	17	44269922	0.131557
		rs17649700	17	43997901	0.130034
		rs2532329	17	44350090	0.128511
		rs62073098	17	44316449	0.126975
		rs2141298	17	44268488	0.125434
		rs2696566	17	44266531	0.123892
		rs1918787	17	44279252	0.122344
		rs17649954	17	44001661	0.120763
		rs2316763	17	43895530	0.119182
		rs117365970	17	43893259	0.117584
		rs77301847	17	43810902	0.115899
		rs1918786	17	44279101	0.114194
		rs75022332	17	43810873	0.112489
		rs2532418	17	44288579	0.110772
		rs55653937	17	44316076	0.109053
		rs2668694	17	44292319	0.107308
		rs1991556	17	44083402	0.105557
		rs62057144	17	43901558	0.103755
		rs8070723	17	44081064	0.101875
		rs2668670	17	44289628	0.0999898
		rs17665188	17	44357351	0.098059
		rs2732605	17	44291381	0.0960617
		rs2732615	17	44364056	0.0940573
		rs2668665	17	44290047	0.0920169
		rs117646503	17	43893260	0.0899001
		rs2732706	17	44351686	0.0877748
		rs75257416	17	44349079	0.0856262
		rs79412431	17	43940021	0.0834672
		rs2668695	17	44292126	0.0811982
		rs2732606	17	44291365	0.0789124
		rs74944644	17	43940020	0.0765545
		rs2696524	17	44356793	0.0739098
		rs2732705	17	44351929	0.0712145
		rs8072451	17	43893716	0.0685112
		rs56329743	17	43931245	0.0657807
		rs36123991	17	44359663	0.0629122
		rs2532419	17	44288281	0.0600259
		rs2732651	17	44345063	0.0570333
		rs2950694	17	44348298	0.0536327
		rs56026128	17	43931244	0.049975
		rs2732628	17	44288284	0.0463046
rs2936870	0
rs6440006	23	rs4683605	3	141094769	0.990909
		rs2871960	3	141121814	0.984446
		rs6763931	3	141102833	0.974005
		rs13077048	3	141106954	0.961507
		rs4683603	3	141092050	0.948537
		rs6440003	3	141094209	0.935503
		rs9853018	3	141101961	0.922016
		rs6763927	3	141140366	0.903004
		rs1344674	3	141125186	0.882372
		rs6764769	3	141100280	0.861606
		rs1344672	3	141125705	0.840226
		rs1991431	3	141133450	0.818564
		rs724016	3	141105570	0.795097
		rs4683606	3	141110074	0.768728
		rs7632381	3	141106063	0.741296
		rs13068733	3	141118028	0.712988
		rs6808936	3	141109321	0.683783
		rs6785012	3	141109348	0.633927
		rs7624084	3	141093285	0.580141
		rs9846396	3	141140968	0.524576
		rs1582874	3	141115219	0.462488
		rs7625643	3	141150026	0.399591
		rs7650602	3	141147414	0.308624
rs6598541	18	rs12906223	15	99255960	0.990321
		rs11857366	15	99263801	0.987831
		rs8031839	15	99253965	0.984679
		rs4965431	15	99269147	0.98149
		rs6598543	15	99293552	0.978159
		rs12911273	15	99295650	0.973082
		rs7166999	15	99292805	0.967357
		rs4966024	15	99295570	0.959647
		rs6598542	15	99293056	0.951828
		rs4965428	15	99267568	0.942246
		rs4966021	15	99285056	0.927113
		rs2137683	15	99289638	0.907535
		rs12898337	15	99294355	0.887853
		rs12908437	15	99287375	0.867627
		rs4966019	15	99274326	0.830503
		rs2871974	15	99284074	0.781114
		rs7166287	15	99273075	0.72839
		rs4965430	15	99268850	0.550542
rs7578393	2	rs6546622	2	26160889	0.999153
		rs6546620	2	26159940	0.948332
rs11205303	3	rs67807996	1	149995265	0.999992
		rs12048493	1	149927034	0.979822
		rs11205277	1	149892872	0.94803
rs12245149	100	rs10740131	10	65271488	0.990362
		rs7897379	10	65301725	0.988874
		rs10740134	10	65315433	0.986954
		rs10761756	10	65172328	0.984961
		rs10822168	10	65165184	0.982654
		rs4405189	10	65013935	0.980158
		rs7075901	10	65280994	0.977603
		rs3847326	10	65331859	0.974954
		rs7920058	10	65293924	0.972221
		rs7085018	10	65286667	0.969316
		rs7920036	10	65293860	0.96618
		rs7902343	10	65005399	0.962995
		rs7912893	10	65162000	0.958808
		rs10822145	10	64934548	0.954475
		rs9919429	10	65313819	0.95013
		rs4595427	10	65012944	0.945323
		rs4454603	10	65012750	0.940464
		rs4400684	10	65012687	0.935573
		rs10995477	10	65010672	0.930678
		rs10761762	10	65184717	0.925534
		rs7100409	10	65330195	0.920145
		rs10822153	10	65056813	0.914741
		rs7923544	10	65182256	0.909329
		rs7895472	10	64961412	0.903511
		rs4379723	10	64963449	0.897683
		rs7100413	10	65330208	0.891718
		rs10761766	10	65190327	0.885704
		rs7077580	10	65180885	0.879662
		rs4746205	10	65329518	0.873574
		rs4486511	10	65264266	0.867485
		rs7895610	10	64961659	0.861383
		rs10761752	10	65160321	0.855193
		rs7095571	10	65150959	0.848999
		rs7907451	10	65328740	0.842782
		rs10761723	10	64955581	0.836552
		rs7896783	10	65162153	0.830166
		rs7899657	10	65323265	0.823775
		rs9971352	10	65265108	0.817348
		rs13095	10	64914372	0.810908
		rs10761727	10	64995493	0.804439
		rs4399232	10	64999490	0.797966
		rs3847325	10	65331511	0.791445
		rs7922587	10	65069614	0.784803
		rs10761763	10	65188318	0.778159
		rs3740331	10	65192288	0.771465
		rs10509189	10	65264126	0.764766
		rs4746204	10	65328518	0.75796
		rs7073746	10	64904071	0.75108
		rs10822149	10	64987412	0.744065
		rs3999089	10	65203808	0.737049
		rs10822181	10	65325126	0.729667
		rs10740115	10	65094990	0.722258
		rs10822158	10	65094383	0.714724
		rs7082470	10	65277026	0.707144
		rs10761779	10	65274927	0.699497
		rs10761778	10	65273782	0.691707
		rs10509186	10	65207018	0.68375
		rs12245367	10	65321464	0.675667
		rs10740116	10	65094992	0.667319
		rs10761772	10	65235829	0.658914
		rs7909269	10	65177766	0.650442
		rs10761771	10	65230164	0.641967
		rs7909960	10	65239177	0.633431
		rs7923609	10	65133822	0.624871
		rs10740125	10	65209609	0.616147
		rs7910927	10	65138910	0.607274
		rs10761750	10	65128619	0.598361
		rs10740126	10	65210935	0.589415
		rs10822164	10	65127258	0.580461
		rs7085621	10	65208926	0.571219
		rs2393977	10	65247609	0.561965
		rs10733792	10	65232539	0.552656
		rs12355784	10	65121565	0.543132
		rs2393966	10	65134814	0.533598
		rs2893919	10	65134778	0.52404
		rs7076310	10	65135672	0.514483
		rs10761751	10	65154885	0.504925
		rs4310508	10	65138573	0.495105
		rs10761742	10	65085048	0.48515
		rs3956912	10	65205881	0.475119
		rs6479896	10	65126832	0.464919
		rs10740129	10	65250808	0.454582
		rs10822160	10	65112796	0.444143
		rs7092784	10	65214749	0.433596
		rs10822161	10	65118203	0.422645
		rs2393969	10	65140440	0.411643
		rs10822163	10	65124098	0.400446
		rs10761758	10	65172747	0.389104
		rs7070296	10	65070438	0.377324
		rs10822156	10	65080727	0.364517
		rs2393984	10	65314971	0.351323
		rs6479905	10	65315231	0.32725
		rs2163188	10	65314711	0.302909
		rs7919685	10	65315800	0.278482
		rs7916868	10	64988931	0.251227
		rs7924036	10	65191645	0.222728
		rs7070761	10	65317056	0.192525
		rs12247907	10	65317045	0.158594
		rs7898861	10	65319678	0.124488
		rs10761785	10	65318766	0.090194
rs35005436	3	rs1635759	7	74339397	0.993198
		rs1637340	7	74337634	0.988599
		rs74910854	7	74110705	0.983171
rs56180201	56	rs10054063	5	173392398	0.990566
		rs28439930	5	173393111	0.98748
		rs75049939	5	173334219	0.984257
		rs55850761	5	173373488	0.979993
		rs6861681	5	173362458	0.969232
		rs17695092	5	173337853	0.958055
		rs966544	5	173350405	0.946645
		rs747472	5	173353514	0.934334
		rs56281418	5	173357810	0.921933
		rs1484803	5	173349840	0.909507
		rs17696147	5	173373143	0.895966
		rs17695555	5	173351081	0.882411
		rs72812811	5	173350990	0.868842
		rs72812826	5	173362726	0.855269
		rs10516107	5	173348156	0.841678
		rs113932433	5	173357206	0.828049
		rs56163845	5	173373948	0.814346
		rs7705507	5	173358337	0.800615
		rs72812840	5	173374655	0.786842
		rs56245789	5	173365310	0.772948
		rs72812832	5	173372625	0.758616
		rs17763083	5	173351488	0.743662
		rs56184817	5	173367586	0.728693
		rs72812816	5	173356638	0.713658
		rs55924019	5	173375257	0.698583
		rs72812842	5	173374760	0.683391
		rs55646464	5	173324971	0.66815
		rs56196025	5	173365448	0.652694
		rs6890591	5	173392315	0.636155
		rs72812817	5	173356748	0.619606
		rs17694835	5	173328024	0.602984
		rs75738222	5	173349404	0.586359
		rs72812804	5	173340496	0.569674
		rs72812850	5	173378286	0.552908
		rs72812852	5	173379347	0.535982
		rs55946741	5	173345023	0.518575
		rs72812805	5	173344153	0.500768
		rs72812847	5	173377817	0.482278
		rs7736263	5	173339222	0.463691
		rs72810983	5	173318254	0.444877
		rs17763772	5	173380934	0.425826
		rs1564823	5	173383194	0.406731
		rs7705502	5	173320815	0.387043
		rs72810995	5	173331851	0.366877
		rs72810989	5	173326714	0.346603
		rs17694791	5	173326891	0.325815
		rs1976074	5	173384663	0.305022
		rs59755656	5	173378180	0.284054
		rs72812818	5	173356752	0.261924
		rs17696407	5	173387335	0.239576
		rs72812861	5	173387509	0.216635
		rs112299234	5	173339531	0.193582
		rs56197583	5	173336792	0.168891
		rs10073186	5	173393823	0.143813
		rs6869166	5	173392403	0.113028
		rs67623241	5	173392638	0.0813767
rs56201652	21	rs66939011	7	92265798	0.990589
		rs11765954	7	92280695	0.979002
		rs3731326	7	92327026	0.966454
		rs6948097	7	92281953	0.952986
		rs6960181	7	92277477	0.933493
		rs73232024	7	92277315	0.911994
		rs12531820	7	92257392	0.890442
		rs11764331	7	92282624	0.867623
		rs6954221	7	92283262	0.844791
		rs11767704	7	92256375	0.821958
		rs10953072	7	92256339	0.79442
		rs17766836	7	92258961	0.764362
		rs11771637	7	92260161	0.733516
		rs7804293	7	92287849	0.702671
		rs42046	7	92252203	0.670968
		rs42044	7	92250140	0.635323
		rs73232029	7	92287283	0.596976
		rs11773884	7	92285123	0.555039
		rs7804722	7	92288106	0.494512
		rs10264916	7	92286376	0.407627
		rs17164683	7	92286980	0.305345
rs62048402	43	rs28562191	16	53799303	0.990218
		rs62033404	16	53822239	0.989418
		rs9939609	16	53820527	0.988598
		rs9926289	16	53820503	0.987011
		rs9936385	16	53819169	0.985367
		rs9923233	16	53819198	0.983697
		rs7185735	16	53822651	0.981964
		rs11075992	16	53820066	0.98023
		rs11075991	16	53819937	0.978481
		rs7206122	16	53822440	0.976729
		rs7190396	16	53822502	0.974975
		rs11075989	16	53819877	0.973207
		rs3751814	16	53818724	0.971399
		rs56313538	16	53818834	0.969582
		rs66908032	16	53822142	0.967765
		rs79994966	16	53823727	0.965942
		rs7206410	16	53821297	0.964114
		rs72803697	16	53822183	0.962284
		rs11075988	16	53819771	0.960451
		rs62033405	16	53822387	0.958575
		rs9923312	16	53819367	0.956695
		rs7202116	16	53821615	0.954805
		rs11075990	16	53819893	0.952781
		rs7202296	16	53821690	0.950675
		rs17817712	16	53821125	0.948526
		rs3751812	16	53818460	0.946354
		rs9935401	16	53816838	0.943931
		rs7187250	16	53810546	0.941136
		rs8051591	16	53816752	0.937412
		rs8063057	16	53812433	0.933332
		rs17817497	16	53815435	0.929165
		rs8050136	16	53816275	0.924739
		rs8043757	16	53813450	0.919925
		rs62033400	16	53811788	0.914591
		rs7193144	16	53810686	0.909199
		rs17817449	16	53813367	0.903639
		rs62033399	16	53810943	0.89761
		rs9972653	16	53814363	0.891059
		rs56094641	16	53806453	0.8825
		rs1558902	16	53803574	0.795809
		rs1421085	16	53800954	0.646695
		rs55872725	16	53809123	0.491297
		rs11642015	16	53802494	0.335201
rs114414434	3	rs75499569	5	51405636	0.999815
		rs116464256	5	51379006	0.954077
		rs115666458	5	51465947	0.884695
rs146518726	236	rs113518234	1	51967299	0.99009
		rs112167117	1	51966943	0.989826
		rs59302433	1	51966611	0.989562
		rs72694167	1	51852096	0.989297
		rs72691893	1	51965870	0.989028
		rs55639076	1	51676350	0.988753
		rs6685946	1	51963530	0.988476
		rs111280073	1	51959476	0.988196
		rs72696137	1	51917244	0.987915
		rs112576034	1	51958809	0.987631
		rs150449315	1	51925019	0.987337
		rs6664884	1	51828498	0.98704
		rs55691002	1	51957320	0.986739
		rs60698990	1	51955827	0.986428
		rs6656341	1	51828499	0.986117
		rs74349898	1	51952790	0.985804
		rs72691874	1	51950703	0.985487
		rs72694173	1	51858450	0.985169
		rs114032030	1	51860679	0.984845
		rs72694177	1	51860790	0.984521
		rs55972866	1	51877590	0.984197
		rs72694200	1	51878994	0.98387
		rs7526406	1	51878752	0.983544
		rs72696103	1	51887120	0.983217
		rs72691871	1	51950251	0.982889
		rs55667545	1	51949832	0.982559
		rs111550988	1	51847213	0.982228
		rs72694159	1	51848949	0.981897
		rs111625476	1	51921203	0.981566
		rs60782272	1	51876749	0.981234
		rs59715648	1	51876499	0.980902
		rs111876348	1	51879565	0.98057
		rs6694227	1	51850801	0.980238
		rs113039001	1	51949307	0.979906
		rs72694169	1	51857507	0.979572
		rs72694171	1	51857917	0.979237
		rs72694190	1	51870729	0.978902
		rs72694189	1	51870525	0.978566
		rs72694193	1	51873395	0.97823
		rs72694192	1	51873381	0.977895
		rs72694130	1	51828128	0.977559
		rs72694138	1	51832943	0.977223
		rs55868733	1	51949550	0.976886
		rs77742485	1	51831570	0.97655
		rs72674582	1	51988100	0.976212
		rs72694135	1	51832702	0.975875
		rs6669003	1	51837310	0.975537
		rs72696110	1	51889891	0.975198
		rs72696107	1	51889202	0.974859
		rs72694143	1	51837697	0.974519
		rs7535155	1	51838677	0.97418
		rs58867548	1	51890625	0.973841
		rs187495104	1	51912157	0.973496
		rs72696148	1	51921439	0.973151
		rs55672422	1	51942474	0.972795
		rs78108947	1	51915697	0.972439
		rs72696135	1	51916365	0.972076
		rs72696122	1	51902791	0.971713
		rs56251532	1	51903430	0.97135
		rs72696126	1	51905540	0.970987
		rs72696129	1	51908076	0.970624
		rs113436173	1	51927967	0.970261
		rs72696161	1	51927117	0.969894
		rs72696159	1	51927064	0.969527
		rs60294217	1	51956050	0.969159
		rs56064204	1	51833554	0.968791
		rs7553017	1	51933918	0.968421
		rs72679103	1	51933247	0.968049
		rs56326822	1	51931089	0.967677
		rs72696145	1	51919816	0.967304
		rs7526429	1	51915027	0.96693
		rs113539819	1	51836510	0.966555
		rs59272392	1	51938182	0.966178
		rs113710543	1	51937709	0.965801
		rs72696151	1	51923360	0.965424
		rs72696149	1	51922078	0.965045
		rs113002366	1	51944642	0.964667
		rs55654180	1	51911785	0.964285
		rs72692301	1	51744481	0.963901
		rs72696140	1	51918369	0.963515
		rs7512458	1	51930232	0.96313
		rs55880270	1	51818481	0.962743
		rs41292515	1	51820016	0.962356
		rs6702800	1	51828925	0.961968
		rs183345174	1	51922774	0.96158
		rs72692285	1	51650416	0.961188
		rs55763623	1	51779056	0.960794
		rs7530091	1	51919263	0.960399
		rs7549556	1	51919252	0.960002
		rs72694122	1	51815124	0.959605
		rs72694121	1	51815091	0.959204
		rs55915918	1	51815588	0.958803
		rs76294895	1	51766636	0.958402
		rs6588404	1	51751680	0.957994
		rs72692287	1	51657231	0.957578
		rs111652808	1	51822948	0.957156
		rs72694106	1	51762346	0.95671
		rs60697084	1	51503258	0.956253
		rs72694144	1	51840447	0.955785
		rs57519873	1	51811185	0.955308
		rs6673415	1	51809479	0.954827
		rs6691707	1	51669038	0.954323
		rs111307188	1	51881357	0.95381
		rs56167325	1	51924159	0.953295
		rs1002721	1	51844346	0.952779
		rs1002720	1	51844358	0.952246
		rs7545921	1	51900775	0.951712
		rs56284497	1	51808467	0.951145
		rs150982068	1	51590008	0.950572
		rs12027854	1	51994888	0.949976
		rs12045600	1	51994894	0.949322
		rs12026316	1	51998263	0.948662
		rs77994327	1	51921618	0.947971
		rs72674590	1	51991008	0.947229
		rs72674586	1	51990321	0.946475
		rs78094029	1	51987313	0.945719
		rs72692264	1	51551334	0.944904
		rs114439578	1	51370716	0.944031
		rs74738164	1	51078223	0.943084
		rs112831120	1	51513075	0.942125
		rs72694183	1	51865403	0.941148
		rs72661386	1	52002010	0.940142
		rs12022114	1	52004740	0.939071
		rs56157924	1	51989746	0.937985
		rs140835615	1	51971690	0.936875
		rs6657654	1	51969417	0.935756
		rs114655413	1	51993515	0.934591
		rs72691891	1	51965500	0.933417
		rs79339614	1	51956304	0.93217
		rs72679113	1	51946549	0.930794
		rs6665465	1	51946276	0.929408
		rs72679112	1	51945365	0.92802
		rs72694198	1	51876782	0.92663
		rs72691879	1	51953130	0.925236
		rs78715030	1	51952783	0.923831
		rs72691876	1	51952849	0.922425
		rs6588409	1	51901022	0.92102
		rs7544977	1	51874987	0.919593
		rs143637015	1	51874860	0.918147
		rs139036273	1	51875805	0.916701
		rs72679110	1	51939188	0.915256
		rs72694150	1	51845562	0.913799
		rs72694153	1	51847351	0.912328
		rs56161287	1	51848627	0.910856
		rs115683130	1	51850145	0.909377
		rs72694163	1	51850672	0.907895
		rs72694166	1	51851785	0.906412
		rs140074095	1	51869828	0.904926
		rs74898383	1	51869004	0.903428
		rs7526469	1	51878785	0.90193
		rs77910451	1	51879033	0.900431
		rs72679106	1	51935344	0.898931
		rs150090654	1	51934788	0.897421
		rs72679114	1	51948107	0.89591
		rs7522189	1	51834521	0.894367
		rs149891466	1	51869846	0.892822
		rs72696112	1	51890793	0.891267
		rs150288978	1	51929985	0.889686
		rs79843335	1	51828003	0.888084
		rs72694131	1	51829281	0.886454
		rs72694142	1	51835307	0.884806
		rs6664504	1	51841328	0.883117
		rs72696134	1	51915699	0.881423
		rs72696108	1	51889585	0.879727
		rs72694161	1	51850525	0.878026
		rs72696157	1	51926978	0.876322
		rs72696138	1	51917538	0.874618
		rs72694128	1	51826210	0.872902
		rs72696128	1	51907312	0.87115
		rs56261634	1	51924519	0.869389
		rs7553078	1	51897733	0.867616
		rs56255751	1	51916782	0.865785
		rs7538988	1	51817541	0.863939
		rs112444602	1	51844060	0.862059
		rs56176004	1	51814797	0.860115
		rs55643430	1	51817581	0.858166
		rs142608110	1	51816759	0.856216
		rs72694123	1	51815355	0.854266
		rs149288352	1	51349663	0.852315
		rs72694118	1	51812830	0.850327
		rs76782211	1	51820415	0.848301
		rs139600178	1	51840953	0.846273
		rs17389704	1	51567458	0.844028
[truncated: 54 more rows]

## Sheet: Supplementary Table 7
Supplementary Table 7: Enrichment of breast cancer in GTX v8's 54 groups as analyzed by PCGA.
System	Tissue	p
Reproductive system (Female)	Breast - Mammary Tissue	0.00000000000000000092
Reproductive system (Female)	Vagina	0.000000000000181
Digestive system	Esophagus - Gastroesophageal Junction	0.000000000000479
Digestive system	Colon - Sigmoid	0.000000000000545
Adipose tissue	Adipose - Subcutaneous	0.0000000000161
Cardiovascular system	Artery - Tibial	0.0000000000306
Digestive system	Esophagus - Muscularis	0.0000000000454
Cardiovascular system	Artery - Aorta	0.000000000545
Adipose tissue	Adipose - Visceral (Omentum)	0.00000000169
Urinary system	Bladder	0.00000000198
Cardiovascular system	Artery - Coronary	0.00000000251
Reproductive system (Male)	Prostate	0.00000000542
Reproductive system (Female)	Uterus	0.0000000143
Reproductive system (Female)	Cervix - Ectocervix	0.0000000478
Digestive system	Esophagus - Mucosa	0.0000000739
Respiratory system	Lung	1.32e-07
Digestive system	Minor Salivary Gland	1.54e-07
Reproductive system (Female)	Cervix - Endocervix	3.14e-07
Digestive system	Colon - Transverse	1.08e-06
Integumentary system	Skin - Sun Exposed (Lower leg)	2.26e-06
Reproductive system (Female)	Fallopian Tube	3.33e-06
Cardiovascular system	Heart - Atrial Appendage	1.26e-05
Digestive system	Small Intestine - Terminal Ileum	1.84e-05
Endocrine system	Thyroid	2.36e-05
Nervous system	Nerve - Tibial	4.13e-05
Digestive system	Stomach	0.000105
Integumentary system	Skin - Not Sun Exposed (Suprapubic)	0.000195
Connective tissue	Cells - Cultured fibroblasts	0.0028
Reproductive system (Female)	Ovary	0.0074
Endocrine system	Adrenal Gland	0.0194
Cardiovascular system	Heart - Left Ventricle	0.116
Muscle tissue	Muscle - Skeletal	0.2503
Endocrine system	Pituitary	0.253
Immune/Blood system	Spleen	0.2728
Urinary system	Kidney - Cortex	0.3058
Digestive system	Pancreas	0.3194
Urinary system	Kidney - Medulla	0.6596
Immune/Blood system	Cells - EBV-transformed lymphocytes	0.8846
Digestive system	Liver	0.9395
Immune/Blood system	Whole Blood	0.9479
Nervous system	Brain - Hypothalamus	0.9782
Reproductive system (Male)	Testis	0.9801
Nervous system	Brain - Frontal Cortex (BA9)	0.9913
Nervous system	Brain - Nucleus accumbens (basal ganglia)	0.9914
Nervous system	Brain - Spinal cord (cervical c-1)	0.9919
Nervous system	Brain - Substantia nigra	0.9932
Nervous system	Brain - Caudate (basal ganglia)	0.9958
Nervous system	Brain - Putamen (basal ganglia)	0.9963
Nervous system	Brain - Amygdala	0.9983
Nervous system	Brain - Anterior cingulate cortex (BA24)	0.9987
Nervous system	Brain - Hippocampus	0.9998
Nervous system	Brain - Cortex	0.9998
Nervous system	Brain - Cerebellar Hemisphere	0.9999
Nervous system	Brain - Cerebellum	0.9999

## Sheet: Supplementary Table 8
Supplementary Table 8: Enrichment of atrial fibrillation in GTX v8's 54 groups as analyzed by PCGA.
System	Tissue	p
Digestive system	Esophagus - Gastroesophageal Junction	0.0000000000000000000000000109
Digestive system	Esophagus - Muscularis	0.0000000000000000000000000502
Cardiovascular system	Heart - Left Ventricle	0.0000000000000000000000000684
Cardiovascular system	Artery - Tibial	0.0000000000000000000000302
Cardiovascular system	Heart - Atrial Appendage	0.0000000000000000000000976
Cardiovascular system	Artery - Coronary	0.000000000000000000347
Digestive system	Colon - Sigmoid	0.0000000000000000069
Cardiovascular system	Artery - Aorta	0.000000000000000385
Muscle tissue	Muscle - Skeletal	0.0000000000000867
Adipose tissue	Adipose - Subcutaneous	0.00000000277
Digestive system	Colon - Transverse	3.51e-07
Digestive system	Stomach	5.26e-07
Adipose tissue	Adipose - Visceral (Omentum)	4.85e-06
Urinary system	Bladder	8.54e-06
Reproductive system (Female)	Uterus	8.7e-06
Reproductive system (Female)	Vagina	1.78e-05
Reproductive system (Female)	Breast - Mammary Tissue	0.000637
Digestive system	Esophagus - Mucosa	0.000868
Connective tissue	Cells - Cultured fibroblasts	0.0014
Respiratory system	Lung	0.0019
Reproductive system (Male)	Prostate	0.0054
Nervous system	Nerve - Tibial	0.0069
Integumentary system	Skin - Sun Exposed (Lower leg)	0.0073
Endocrine system	Adrenal Gland	0.0178
Reproductive system (Female)	Cervix - Endocervix	0.0245
Digestive system	Minor Salivary Gland	0.0286
Digestive system	Small Intestine - Terminal Ileum	0.0381
Reproductive system (Female)	Cervix - Ectocervix	0.0463
Integumentary system	Skin - Not Sun Exposed (Suprapubic)	0.0827
Endocrine system	Thyroid	0.1408
Reproductive system (Female)	Fallopian Tube	0.1837
Reproductive system (Female)	Ovary	0.3074
Nervous system	Brain - Spinal cord (cervical c-1)	0.5611
Nervous system	Brain - Substantia nigra	0.5752
Endocrine system	Pituitary	0.6565
Nervous system	Brain - Frontal Cortex (BA9)	0.7711
Nervous system	Brain - Hypothalamus	0.8161
Nervous system	Brain - Cerebellar Hemisphere	0.8513
Immune/Blood system	Cells - EBV-transformed lymphocytes	0.9047
Nervous system	Brain - Anterior cingulate cortex (BA24)	0.931
Nervous system	Brain - Cerebellum	0.939
Nervous system	Brain - Hippocampus	0.9392
Immune/Blood system	Spleen	0.94
Nervous system	Brain - Amygdala	0.9483
Digestive system	Liver	0.949
Nervous system	Brain - Putamen (basal ganglia)	0.9521
Urinary system	Kidney - Cortex	0.961
Nervous system	Brain - Cortex	0.9633
Nervous system	Brain - Caudate (basal ganglia)	0.9697
Digestive system	Pancreas	0.9839
Immune/Blood system	Whole Blood	0.9927
Nervous system	Brain - Nucleus accumbens (basal ganglia)	0.9953
Urinary system	Kidney - Medulla	0.9999
Reproductive system (Male)	Testis	1

## Sheet: Supplementary Table 9
Supplementary Table 9: Tissues cross-enriched in BC and AF as analyzed by PCGA.
Cross-enriched tissue	p.Breast cancer	p.Atrial fibrillation
Adipose - Subcutaneous	1.61e-11	2.77e-09
Adipose - Visceral (Omentum)	1.69e-09	4.85e-06
Artery - Aorta	5.45e-10	3.85e-16
Artery - Coronary	2.51e-09	3.47e-19
Artery - Tibial	3.06e-11	3.02e-23
Bladder	1.98e-09	8.54e-06
Breast - Mammary Tissue	9.2e-19	0.000637
Colon - Sigmoid	5.45e-13	6.9e-18
Colon - Transverse	1.08e-06	3.51e-07
Esophagus - Gastroesophageal Junction	4.79e-13	1.09e-26
Esophagus - Mucosa	7.39e-08	0.000868
Esophagus - Muscularis	4.54e-11	5.02e-26
Heart - Atrial Appendage	1.26e-05	9.76e-23
Stomach	0.000105	5.26e-07
Uterus	1.43e-08	8.7e-06
Vagina	1.81e-13	1.78e-05

[truncated: 13 more sheets: Supplementary Table 10, Supplementary Table 11, Supplementary Table 12, Supplementary Table 13, Supplementary Table 14, Supplementary Table 15, Supplementary Table 16, Supplementary Table 17, Supplementary Table 18, Supplementary Table 19, Supplementary Table 20, Supplementary Table 21, Supplementary Table 22]
